# Simple and rapid separation of diverse neoagaro-oligosaccharides

Fudi Lin<sup>1</sup>, Yayan Huang<sup>1</sup>, Na Zhang<sup>1</sup>, Jing Ye<sup>1</sup>, Meitian Xiao<sup>1,2\*</sup>

<sup>1</sup>College of Chemical Engineering, Huaqiao University, Xiamen, Fujian, China

<sup>2</sup>Xiamen Engineering and Technological Research Center for Comprehensive Utilization  
of Marine Biological Resources, Xiamen, Fujian, China

\*Corresponding author.

E-mail: [mtxiao@hqu.edu.cn](mailto:mtxiao@hqu.edu.cn) (MTX).

1  
2  
3  
4  
5  
6  
7  
8  
9  
10  
11  
12  
13  
14  
15  
16  
17  
18  
19  
20  
21  
22  
23  
24  
25  
26  
27  
28

## 29 **Abstract**

30 A rapid and simple method for obtaining pure and well-defined oligosaccharides was  
31 established by hydrolyzing agar with  $\beta$ -agarase from *Vibrio natriegens*. The conditions  
32 for enzymolysis were optimized as follows: temperature of 45 °C, pH of 8.5, substrate  
33 concentration of 0.3%, enzyme amount of 100 U/g and enzymolysis time of 20 h.  
34 Neoagaro-oligosaccharides with different degree of polymerizations were gained by  
35 hydrolyzing agar with  $\beta$ -agarase at different enzymolysis time. After removing pigment  
36 by activated carbon and salts by dialyzing, the enzyme hydrolysis solution was separated  
37 with Bio-Gel P2 column chromatography. Neoagaro-oligosaccharides with different  
38 degree of polymerizations were acquired. By comparing with standard substances, along  
39 with further confirmation by FTIR, MS and NMR, structures of the purified  
40 neoagaro-oligosaccharides were identified as neoagarobiose, neoagarotetraose,  
41 neoagarohexaose, neoagaroctaose, neoagarodecaose and neoagarododecaose with  
42 purities more than 97.0%, respectively. The present study established a method for rapid  
43 preparation of various monomers of neoagaro-oligosaccharides that may be of great  
44 significance for further study of bioactivities.

45 **Keywords:** Agar; Enzymatic hydrolysis; Neoagaro-oligosaccharides; Separation

## 46 **Introduction**

47 Agar, an important marine polysaccharide extracted from the cell walls of red algae, is  
48 a linear polymer containing (1 $\rightarrow$ 4)-linked 3,6-anhydro- $\alpha$ -L-galactose and (1 $\rightarrow$ 3)-linked  
49  $\beta$ -D-galactopyranose [1], and it is composed of agarose and agaropectin [2]. Agar is  
50 widely used in food, biological, and pharmaceutical industries [3]. Accumulating reports  
51 have indicated the oligosaccharides prepared from agar/agarose have diverse  
52 physiological functions such as antioxidant [4-8], anti-hyperlipidemia [9, 10],  
53 anti-inflammation [11-13], and whitening effect [14, 15] etc, which will expand its use in  
54 the food, cosmetic, and medical industries.

55 Generally, oligosaccharides from agar/agarose can be classified into  
56 agaro-oligosaccharides (AOS) [16-18] and neoagaro-oligosaccharides (NAOS) [19-21],  
57 the former are the hydrolysis products of acid or  $\alpha$ -agarase which cleaves  $\alpha$ -(1 $\rightarrow$

58 3)-galactosidic bond of the polysaccharides, and the latter are hydrolysates of  $\beta$ -agarase  
59 which splits  $\beta$ -(1 $\rightarrow$ 4) bond. AOS and NAOS with different degree of polymerizations  
60 (DPs) have been reported to possess various bioactivities. A large amount of reports  
61 indicated that AOS have the beneficial effects of antioxidant [4-8], anti-obesity [9, 10],  
62 anti-inflammation [11-13], anti-cancer [22], and protect the intestine [9, 10, 22] etc. In  
63 recent years, NAOS mixtures as well as NOAS of signal DP have obtained increasing  
64 attention for its distinct physiological and biological activities. According to the reported  
65 prebiotic studies, the NAOS with DPs of 4-12 could increase the amount of *lactobacilli*  
66 and *bifidobacteri in vivo*, suggesting they had good probiotic effect [23]. Neoagarobiose  
67 (NA2), neoagarotetraose (NA4), and neoagarohexaose (NA6) were reported to have *in*  
68 *vitro* skin whitening and moisturizing effects, among them, NA4 was found to be a better  
69 whitening agent than the other two, whereas AOS did not exhibit the same activities[14,  
70 15]. Moreover, NA4 displayed better ability to scavenge hydroxyl radicals compared with  
71 NA2, NA6, and neoagarooctaose (NA8), meanwhile, the scavenging activities on  
72 hydroxyl radicals was not found for agarotriose and agarobiose. Additionally, NA4 was  
73 proved to inhibit inflammation in LPS-stimulated macrophages through suppression of  
74 MAPK and NF- $\kappa$ B pathways [24, 25].

75 Notably, these studies mainly focused on the activities of NAOS mixture, NA2, NA4,  
76 and NA6, while few reports investigated the bioactivities of NAOS with higher DPs such  
77 as NA8, neoagarodecaose (NA10), and neoagarododecaose (NA12), etc. The reasons  
78 may be attributed to the difficulty of obtaining NAOS with higher DPs and the  
79 complexity of purification of them. Many efforts have been devoted to obtain NAOS.  
80  $\beta$ -Agarases from marine bacterium *Janthinobacterium* sp. SY12, *Vibrio* sp. Strain  
81 JT0107, *Agarivorans albus* YKW-34 and *Agarivorans albus* OAY02 were employed to  
82 degrade agarose to give NA2 and NA4 [26-28]. And  $\beta$ -agarase obtained from  
83 *Microbulbifer* sp. Q7, marine *Alteromonas* sp. SY37-12, *Pseudoalteromonas* sp. CY24,  
84 marine *Agarivorans* sp. LQ48 and *Pseudoalteromonas* sp. AG4 could hydrolyze  
85  $\beta$ -1,4-glycosidic linkages of agarose/agar to gain NA4 and NA6 [29-33].  $\beta$ -Agarases  
86 isolated from *Stenotrophomonas* sp. NTa and *Agarivorans* sp. JA-1 in *Bacillus subtilis*  
87 degraded agarose/agar to NA2, NA4 and NA6 as the predominant products [34, 35].

88 *Agarivorans albus* OAY02 could secrete two  $\beta$ -agarases, among them, one  $\beta$ -agarase  
89 could cleave agarose into NA2 and NA4, the other  $\beta$ -agarase made agarose become NA2,  
90 NA4, NA6 and NA8 [36]. And  $\beta$ -agarase from marine *Pseudoalteromonas* sp. CY24  
91 could degrade agarose to NA8 and NA10 [37].  $\beta$ -Agarase from marine bacteria can  
92 degrade agarose to NAOS with different DPs, however, up to now it has not been  
93 reported that  $\beta$ -agarase could degrade agarose/agar to obtain NAOS with desired DPs at  
94 different enzymolysis time.

95 Developing methods for rapid separation and purification of NAOS is also very  
96 important for obtaining purified NAOS. Size-sieving based on gel-permeation  
97 chromatography (GPC) and high performance anion exchange chromatography (HPAEC)  
98 are commonly used methods for the separation of polysaccharides and oligosaccharides  
99 [6, 38-41]. Toyopearl HW-40S was used to purify NA4[38]. It was reported that NAOS  
100 with DP of 2, 4, and 6 could be separated and purified by Bio-Gel P2 [40, 41] and NA4,  
101 NA6, NA8, NA10 and NA12 could be separated by two chromatography steps of  
102 consecutive Bio-Gel P-6 chromatography [40]. Sephadex G-10 combined with G-25 was  
103 employed to purify AOS [6, 39]. The SEC-HPLC and NH<sub>2</sub>-HPLC systems were used to  
104 isolate and purify NAOS and AOS [42]. A HPAEC system equipped with a  
105 semi-preparative CarboPac™ PA100 column was applied to prepare NAOS and AOS  
106 from DP 2 to DP 22 with product yield and purity no more than 17.2% and 77.7%,  
107 respectively [43]. However, these methods are a little bit complicated, time-consuming,  
108 and instrument-depending, and the product yield and purity of obtained oligosaccharides  
109 are not high enough for further study. Therefore, to deeply understand the bioactivities  
110 and the mechanism of NOAS, it is urgent to develop a simple and rapid method for the  
111 preparation of NAOS with various DPs.

112 In the present study, a simple method of obtaining NAOS with desired DPs was  
113 established by regulating the enzymolysis time of  $\beta$ -agarases. And a gel filtration  
114 chromatography was developed for the rapid preparation of each NAOS with different  
115 DPs in high quality and quantity, making it possible to the further studies on their  
116 bioactivities.

117

## 118 **Materials and methods**

### 119 **Strains and reagents**

120 NA2, NA4, NA6, NA8, NA10 and NA12 used as standards were purchased from  
121 Qingdao bozhahui Biological Technology Co. Ltd (Qingdao, China). Acetonitrile were  
122 gained from Sigma-Aldrich (St. Louis, MO, USA). All the other reagents were  
123 commercially available and of analytical grade.

124 The culture and fermentation condition of *Vibrio natriegens* was the same as what was  
125 explored in our previous work[44]. The obtained  $\beta$ -agarase was purified from the  
126 fermentation liquor with the combination of ammonium sulfate salting-out, dialysis, ion  
127 exchange chromatography and gel-filtration. The enzymatic activity of the purified  
128  $\beta$ -agarase reached 103 U/mL, which was applied in this work for the later experiment.

### 129 **Optimization of enzymatic hydrolysis condition**

130 The enzymatic hydrolysis condition including reaction temperature (30, 35, 40, 45,  
131 50, 55 and 60 °C), pH (6.0, 6.5, 7.0, 7.5, 8.0, 8.5 and 9.0), reaction time (1, 5, 10, 15, 20,  
132 25 and 30 h), substrate concentration (0.1, 0.2, 0.3, 0.4, 0.5, 0.6 and 0.7%) and enzyme  
133 amounts (20, 40, 60, 80, 100, 120 and 140 U/g) were optimized. All hydrolysis reactions  
134 were conducted in triplicate.

### 135 **Preparation of NAOS products with different enzymolysis time**

136 3% Agar solution was completely dissolved in 1 L of 0.1 M Tris-HCl solution by  
137 heating and then cooled to 45 °C. Subsequently, the solution was treated with the  
138  $\beta$ -agarase for 4 h, 6 h, 8 h, 10 h and 12 h to obtain products A, B, C, D and E,  
139 respectively. After inactivation with boiling water bath for 15 minutes and centrifugation  
140 for 30 min ( $12,000 \times g$ ), the insoluble agar was removed and the NAOS in supernatant  
141 was filtered with a 0.22  $\mu\text{m}$  membrane (Millipore, Cork, Ireland). The crude products of  
142 different enzymolysis time were finally obtained by lyophilization and stored at -20 °C  
143 for further use.

## 144 **Analysis of NAOS products by HPLC-ELSD**

145 The NAOS products were analyzed by HPLC-ELSD system which consisted of a  
146 Waters e2695 HPLC system (Waters, Milford, MA, USA) equipped with an evaporative  
147 light scattering detector (Waters 2424, USA). Separation was performed on an Asahipak  
148 NH<sub>2</sub>P-50 4E multi-mode analytical column (250 mm×4.6 mm, 5 μm) with the column  
149 temperature of 30 °C. Isocratic elution was conducted with acetonitrile-water (65:35) as  
150 the mobile phase with a flow rate of 1 mL/min. The injection volume was set at 10 μL  
151 and the detector nebulizer temperature was 75 °C.

## 152 **Rapid purification of NAOS**

153 For the purification of NAOS, 1 g crude NAOS product powder was resuspended in  
154 200 mL distilled water, followed by addition of 10 g activated carbon. The mixture was  
155 stirred for 2 h and then NAOS were washed out by 30% ethanol solution and ethanol was  
156 removed by rotary evaporator. Then the left was freeze dried and detected.

157 GPC was applied to separate the NAOS. 250 mg of products A was resuspended in 1  
158 mL of NH<sub>4</sub>HCO<sub>3</sub> (0.1 M), and the solutions were loaded onto the Bio-Gel P2 column (18  
159 × 150 cm, Bio-Rad Laboratories, Hercules, CA, USA), respectively. NH<sub>4</sub>HCO<sub>3</sub> was used  
160 as eluent at a flow rate of 0.4 mL/min and fractions of 4 mL each were collected. Then  
161 the collected fractions were detected by TLC on a Silica Gel 60 plate (Merck, Darmstadt,  
162 Germany) developed with a solvent of isopropanol/water/ammonium hydroxide (30:15:2,  
163 v/v/v). After being sprayed by anisaldehyde and heated for 10 min, the spot of the  
164 products could be visualized.

## 165 **Identification of NAOS**

166 The structure of isolated NAOS was elucidated by FTIR and the molecular mass was  
167 confirmed by ESI-TOF-MS analysis. The FTIR spectra of KBr pellets of the NAOS after  
168 drying at 105 °C for 2 h were recorded on the FTIR (FTIR-84, Shimadzu, Japan)  
169 spectrophotometer. Scans were performed over the range of 4000 - 400 cm<sup>-1</sup> with a  
170 resolution of 4 cm<sup>-1</sup> for 32 times. ESI-TOF-MS analysis was carried out on a Q Exactive  
171 Hybrid Quadrupole Orbitrap mass spectrometer (Thermo, Bremen, Germany) coupled

172 with an ESI source in positive ion mode. Recorded mass range was  $m/z$  200 - 2000.  
173  $^1\text{H-NMR}$  and  $^{13}\text{C-NMR}$  spectra were measured in  $\text{D}_2\text{O}$  on a Avance 500 spectrometer  
174 (Bruker, Avance III, Switzerland, 500 MHz  $^1\text{H}$ , 125 MHz  $^{13}\text{C}$ ) at room temperature and  
175  $\text{C}_3\text{D}_6\text{O}$  was added as an internal standard with the chemical shifts were reported in  $\delta =$   
176 2.05 ppm for  $^1\text{H-NMR}$ ,  $\delta = 29.84$  ppm for  $^{13}\text{C-NMR}$ .

## 177 **Results and discussion**

### 178 **Optimization of hydrolysis parameters by single factor** 179 **experiments**

180 Single factor experiments were carried out to optimize the enzymatic hydrolysis  
181 process. Fig. 1a displayed the influence of temperature on the yield of reducing sugar.  
182 Temperature is an important factor in the process of enzymatic hydrolysis. Within a  
183 certain temperature range, the raise of temperature is beneficial to enzymatic reaction. As  
184 shown in Fig. 1a, the yield of reducing sugar was increased with the elevation of  
185 temperature and it reached 45.2% at the temperature of 45 °C, after that the yield was  
186 decreased significantly with the raise of temperature. Therefore, the temperature was set  
187 at 45 °C. The pH is another vital parameter in the enzymatic hydrolysis process, because  
188 enzyme activity is greatly affected by pH value. Generally, an enzyme can maintain high  
189 enzyme activity under suitable pH. As known in Fig. 1b, the yield of reducing sugar was  
190 increased with the increase of pH from 6.0 to 8.5, the largest yield of reducing sugar was  
191 42.7% at pH 8.5. Then the yield was decreased, which may be attributed to the increase  
192 of pH on the inhibition of the  $\beta$ -agarase activity. As for the substrate concentration, low  
193 substrate concentration leads to low enzyme utilization, however, too high the substrate  
194 concentration will hinder the diffusion of molecules and reduce the enzymatic reaction  
195 rate. As showed in Fig. 1c, when the substrate concentration was set at 0.3%, the yield of  
196 reducing sugar reached the highest of 43.3%. In addition, not only enzyme amount but  
197 also enzymolysis time has prominent effects on the yield of reducing sugar [45, 46]. The  
198 enzyme amounts were also investigated in the present study and the adding amount at  
199 100 U/g turned out to be optimal with the reducing sugar yield of 42.4%, and the yield of

200 reducing sugar had remained almost stable after the enzyme amount added was more than  
201 100 U/g. Fig. 1e indicated that the yield of reducing sugar increased with the extension of  
202 enzymolysis time before the time of 20 h. When the enzymolysis time was 20 h, reducing  
203 sugar yield reached the highest at 43.3%, and the generation of reducing sugar didn't  
204 appear to increase over 20 h of enzymolysis time. Therefore, the optimized conditions  
205 were optimized as follows: the temperature of 45 °C, the pH of 8.5, the substrate  
206 concentration of 0.3%, the enzyme amount of 100 U/g and the enzymolysis time of 20 h.

207 **Fig. 1 Effects of enzymolysis condition on reducing sugar yield**

## 208 **Preparation of NAOS with different DPs**

209 The  $\beta$ -agarase obtained by the different strains would degrade agar to gain the NAOS  
210 with different DPs [26, 30, 34, 35]. Specifically, the regular changes of NAOS with  
211 different DPs at different enzymolysis time were found in the present study (Fig.2),  
212 which was not mentioned in the previous reports. The enzymolysis products were  
213 determined with HPLC-ELSD by comparing with standard substances and the content of  
214 each oligosaccharide was calculated from the regression equations, as shown in Fig.2 and  
215 table 1 and table 2, and the enzymolysis product was analyzed to be composed of NA2,  
216 NA4, NA6, NA8, NA10 and NA12 with the yield of 5.0%, 38.9%, 18.1%, 16.8%, 13.8%  
217 and 2.5% respectively after the agar was hydrolyzed by  $\beta$ -agarase for 4 h. When the  
218 hydrolysis time was 6 h, NA12 was completely hydrolyzed and the product obtained was  
219 NA2, NA4, NA6, NA8, and NA10, the yield were 6.0%, 52.7%, 15.2%, 13.7%, and 11%,  
220 respectively. As the hydrolysis time prolonged to 8 h, NA10 was not detected in the  
221 product and the yield for NA2, NA4, NA6 and NA8 were 9.3%, 59.5%, 13.7% and  
222 11.7%, respectively. With the extension of the hydrolysis time, the DPs of NAOS  
223 obtained were getting smaller and smaller. When the hydrolysis time was 10 h, the  
224 product was consisted of NA2, NA4, and NA6 with the yield of 13.8%, 68.4% and 9.6%  
225 separately. And the hydrolysis time reached 12 h, only NA4 and NA2 were left in the  
226 product with the yield of 21.6% and 71.1%, and the product components were no longer  
227 changed with the extension of time.

228 **Fig. 2 Anlysis of enzymatic hydrolysates with different enzymolysis time, S-NAOS**



229 **standards, 1-NA2, 2-NA4, 3-NA6, 4-NA8, 5-NA10, 6- NA12; A 4 h, B 6 h, C 8 h, D 10**  
230 **h, E 12 h**

231 **Table. 1 The regression equations of NAOS**

| Oligosaccharide | Equation           | R <sup>2</sup> |
|-----------------|--------------------|----------------|
| NA2             | y=6.29305x-2.21022 | 0.992          |
| NA4             | y=6.05888x-3.18131 | 0.996          |
| NA6             | y=5.54881x-3.71928 | 0.997          |
| NA8             | y=4.8549x-4.42057  | 0.996          |
| NA10            | y=4.48493x-3.88547 | 0.994          |
| NA12            | y=4.25971x-3.75222 | 0.992          |

232 x: the concentration of NAOS (mg/ml), y: peak area  $\times 10^{-6}$ .

233 **Table. 2 The percentage of monomers at different hydrolysis time**

|          | A    | B    | C    | D    | E    |
|----------|------|------|------|------|------|
| NA2 (%)  | 5    | 6    | 9.3  | 13.8 | 21.6 |
| NA4 (%)  | 38.9 | 52.7 | 59.5 | 68.4 | 71.1 |
| NA6 (%)  | 18.1 | 15.2 | 13.7 | 9.6  | 0    |
| NA8 (%)  | 16.8 | 13.7 | 11.7 | 0    | 0    |
| NA10 (%) | 13.8 | 11   | 0    | 0    | 0    |
| NA12 (%) | 2.5  | 0    | 0    | 0    | 0    |

234 At present, there are mounting reports on the preparation of NAOS by enzymatic  
235 method and agarase is mainly derived from the secretion of marine bacteria. Frequently  
236  $\beta$ -agarase is found to degrade agar to generate NA2, NA4, or NA6 as the main products.  
237 The DagA secreted  $\beta$ -agarase which could hydrolyze agar to gain NA2, NA4 and NA6  
238 [47]. And it was reported  $\beta$ -agarase from *Stenotrophomonas sp.* NTa degraded agar only  
239 obtained NA2, NA4 and NA6 as the predominant products and a small amount of  
240 3,6-anhydro- $\alpha$ -L-galactose, and notably the products did not change with the change of  
241 the hydrolysis time [35]. At the same time, the composition of the agarolytic did not  
242 changed over time by some  $\beta$ -agarase, which included four even-numbered NAOS with  
243 DP of 2-8, and the amount of NA4 was more than others [25]. However, these methods

244 found in literature were used in preparing NAOs mainly with DP no more than eight [25,  
245 35, 47]. Interestingly, we found in our study that the DPs of the NAOS reduced regularly  
246 with the enzymolysis time increased every two hours, and the final product was  
247 composed of NA4 and NA2. Therefore, desired NOAS with different DPs could be  
248 obtained by controlling the hydrolysis time, which was beneficial to the further studies of  
249 NAOS.

## 250 **Rapid isolation of NAOS**

251 Separation and purification of NAOS was carried out using a Bio-Gel P2 column and  
252 detected by TLC, and the result was shown in Fig. 3. For product A, fractions of 18 to 22  
253 were NA12 with the yield of 3.2%, fraction 24 to fraction 27 were NA10 with the yield of  
254 4.2%, fraction 30 to fraction 35 was NA8 with the yield of 7.5%, fraction 37 to fraction  
255 40 was NA6 with the yield of 10.2%, fraction 44 to fraction 56 was NA4 with the yield of  
256 35.8%, fraction 61 to fraction 64 was NA2 and the yield was 23.2%, respectively. After  
257 detected by HPLC-ELSD, the purity of NA2, NA4, NA6, NA8, NA10 and NA12 were  
258 99.3%, 98.9%, 98.0%, 97.6%, 97.3% and 97.4%, respectively (Fig.4).

259 GPC and HPAEC are commonly used method for separation and preparation of NAOS  
260 and Bio-Gel P-2 and Bio-Gel P-6 are frequently applied to purify NAOS [6, 38-43].  
261 However, these two separation media are usually jointly used to prepare NAOS with  
262 diverse DPs. Noticeably, in the present study, one chromatography step of Bio-Gel P-2  
263 column chromatography could be developed to obtain NAOS of DP2-12 with purities  
264 more than 97%, suggesting it is a simple and rapid method for the preparation of NAOS.

265 **Fig. 3 TLC analysis of purified NAOS. The ladder of NAOS with different DP (2-12);**  
266 **S: NAOS standards; Fractions 18-22: NA 12, Fractions 24-27: NA 10, Fractions**  
267 **30-35: NA8, Fractions 37-40: NA 6, Fractions 44-56: NA4, Fractions 61-64: NA2**

268 **Fig. 4 High liquid chromatograms of purified products**

## 269 **Structure and molecular confirmation of NAOS**

270 The structures and the molecular mass of the purified NAOS were confirmed by FTIR  
271 and MS analysis. Fig.5 demonstrated the results of the FTIR analyses. In all the six

272 obtained oligosaccharides, the disappearance of absorption band around 1260 cm<sup>-1</sup>  
273 indicated the elimination of sulfate group in the degradation process. There was a broad  
274 absorption band around 3400 cm<sup>-1</sup>, which may be assigned to hydroxyl group. The region  
275 around 2950 cm<sup>-1</sup> and 2900 cm<sup>-1</sup> were assigned to C-H. The band around 1640 cm<sup>-1</sup>  
276 suggested the existence of C-C sugar ring. The fingerprint region, including many FTIR  
277 absorptions of specific characteristic bonds, was a region of lower wave numbers. There  
278 was absorption band around 1159 cm<sup>-1</sup> was the stretch vibration of C-O within C-O-H.  
279 Absorption bands appeared at 1072 cm<sup>-1</sup>, indicating the presence of C-O within C-O-C  
280 bond. A well-defined peak was shown at about 930 cm<sup>-1</sup> corresponding to 3,  
281 6-anhydro-D-galactose.

### 282 **Fig. 5 FTIR spectrum of NAOS**

283 The ESI-TOF-MS analysis results were displayed in on table 3, confirming the purified  
284 oligosaccharides were NA2, NA4, NA6, NA8, NA10 and NA12, respectively. The NA4  
285 was shown in Fig. 6 and other monomers were in S1 Fig.

### 286 **Fig. 6 The ESIMS spectra of NA4**

287 **Table 3 The ESI-TOF-MS analysis of the purified products**

| purified products | MS signals(m/z)<br>[M+Na] <sup>+</sup> | Calculated molecular<br>weights |
|-------------------|----------------------------------------|---------------------------------|
| NA2               | 347.0949                               | 347.0954                        |
| NA4               | 653.1886                               | 653.1905                        |
| NA6               | 959.2866                               | 959.2856                        |
| NA8               | 1265.3752                              | 1265.3807                       |
| NA10              | 1571.4752                              | 1571.4757                       |
| NA12              | 1877.5751                              | 1877.5708                       |

288 The structural information of six monomers was demonstrated by <sup>1</sup>H-NMR and  
289 <sup>13</sup>C-NMR spectroscopy. Assignments of <sup>1</sup>H-NMR and <sup>13</sup>C-NMR spectroscopy were built  
290 the close similarity with literature values, and the interpretation of these signals was  
291 shown in Fig. 7 and table 4 [1, 41, 42]. It indicated twelve particular major anomeric  
292 carbon signals (G and A), which was anticipated that the NA2 was the major repeat unit,

293 and the signals (Gnr and Anr) were the residues towards the nonreducing end of the  
294 NAOS. Resonances at about 96.6 and 92.6 ppm were characteristic of  $\beta$  and  $\alpha$  anomeric  
295 form of galactose residues at the reducing end of the NAOS[40, 48], respectively, and the  
296 NA4 of  $^{13}\text{C}$ -NMR was showed on Fig. 8, and  $^1\text{H}$ -NMR and  $^{13}\text{C}$ -NMR of other monomers  
297 were in S2 Fig and S3 Fig, respectively.

298 **Fig. 7  $^1\text{H}$  NMR spectra of NA4, Peak labels: A, 3,6 anhydrogalactose; G, galactose;**  
299 **nr and r refer to the non-reducing and reducing ends;  $\alpha$ ,  $\beta$  refer to positions of**  
300 **protons on reducing ends; numbers from 1 to 6 refer to place of protons**

301 **Fig. 8  $^{13}\text{C}$  NMR spectra of NA4**

302 **Table 4 Chemical shift assignments for  $^{13}\text{C}$ -NMR spectra of NAOS**

| Unit        | C1    | C2   | C3   | C4   | C5   | C6   |
|-------------|-------|------|------|------|------|------|
| Gnr         | 102.2 | 69.9 | 82.0 | 67.8 | 75.1 | 61.3 |
| Gr $\beta$  | 96.6  | 69.9 | 82.5 | 68.6 | 75.1 | 61.3 |
| Gr $\alpha$ | 92.6  | 67.8 | 79.9 | 69.2 | 69.9 | 61.4 |
| Anr         | 98.3  | 69.4 | 80.8 | 69.6 | 77.3 | 68.7 |
| Ar $\alpha$ | 98.1  | 69.5 | 79.9 | 77.3 | 75.3 | 69.0 |

## 303 **Conclusions**

304 In summary, the present study has developed a feasible approaches for the  
305 preparation of desired NAOS with different DPs by regulating the enzymolysis time of  
306  $\beta$ -agarase. Furthermore, the NAOS of diverse DPs were rapidly and simply prepared by  
307 the Bio-gel P2 column chromatography with purities higher than 97% for further  
308 evaluating their bioactivity potentials.

## 309 **Acknowledgment**

310 This work was supported by Subsidized Project for Postgraduates' Innovative Fund  
311 in Scientific Research of Huaqiao University; and the Public Science and Technology  
312 Research Funs Projects of Ocean [grant numbers 20130515-2, 201505026-5].

## 313 **Conflict of interest statement**

314 The authors declared no conflict of interest.

## 315 **References**

- 316 1. Hamer GK, Bhattacharjee SS, Yaphe W. Analysis of the enzymic hydmlyls products of agahose by  
317 C-NMR. *Carbohydrate research*. 1977;54(1):C7-C10.
- 318 2. Jensen A. Present and future needs for algae and algal products. *Hydrobiologia*. 1993;260/261:15-23.
- 319 3. Chi WJ, Chang YK, Hong SK. Agar degradation by microorganisms and agar-degrading enzymes.  
320 *Applied microbiology and biotechnology*. 2012;94(4):917-30. doi: 10.1007/s00253-012-4023-2. PubMed  
321 PMID: 22526785.
- 322 4. Chen HM, Zheng L, Yan XJ. The preparation and bioactivity research of agaro-oligosaccharides.  
323 *Food Technology and Biotechnology*. 2005;43(1):29-36.
- 324 5. Chen HM, Yan XJ. Antioxidant activities of agaro-oligosaccharides with different degrees of  
325 polymerization in cell-based system. *Biochimica et biophysica acta*. 2005;1722(1):103-11. doi:  
326 10.1016/j.bbagen.2004.11.016. PubMed PMID: 15716131.
- 327 6. Wu SC, Wen TN, Pan CL. Algal-oligosaccharide-lysates prepared by two bacterial agarases stepwise  
328 hydrolyzed and their anti-oxidative properties. *Fisheries Science*. 2005;71:1149-59.
- 329 7. Chen H, Yan X, Zhu P, Lin J. Antioxidant activity and hepatoprotective potential of  
330 agaro-oligosaccharides in vitro and in vivo. *Nutrition journal*. 2006;5:31-42. doi: 10.1186/1475-2891-5-31.  
331 PubMed PMID: 17140450; PubMed Central PMCID: PMC1698930.
- 332 8. Kang OL, Ghani M, Hassan O, Rahmati S, Ramli N. Novel agaro-oligosaccharide production through  
333 enzymatic hydrolysis: Physicochemical properties and antioxidant activities. *Food Hydrocolloids*.  
334 2014;42:304-8. doi: 10.1016/j.foodhyd.2014.04.031.
- 335 9. Higashimura Y, Naito Y, Takagi T, Uchiyama K, Mizushima K, Ushiroda C, et al. Protective effect of  
336 agaro-oligosaccharides on gut dysbiosis and colon tumorigenesis in high-fat diet-fed mice. *American*  
337 *Journal of Physiology-Gastrointestinal and Liver Physiology*. 2016;310(6):G367-G75. doi:  
338 10.1152/ajpgi.00324.2015.-High-fat.
- 339 10. Higashimura Y, Baba Y, Inoue R, Takagi T, Mizushima K, , Ohnogi H, et al. Agaro-oligosaccharides  
340 regulate gut microbiota and adipose tissue accumulation in mice. *Journal of Nutritional Science and*  
341 *Vitaminology*. 2017;63(4):269-76.
- 342 11. Enoki T, Tanabe M, Shimomura M, Ohnogi H. Induction mechanism of heme oxygenase-1 and  
343 anti-inflammatory activity by agaro-oligosaccharides. *Nippon Shokuhin Kogyo Gakkaishi*.  
344 2010;57(4):157-62.
- 345 12. Enoki T, Tominaga T, Takashima F, Ohnogi H, Sagawa H, Kato I. Anti-tumor-promoting activities of  
346 agaro-oligosaccharides on two-stage mouse skin carcinogenesis. *Biological & Pharmaceutical Bulletin*.  
347 2012;35(7):1145-9.
- 348 13. Higashimura Y, Naito Y, Takagi T, Tanimura Y, Mizushima K, Harusato A, et al. Preventive effect of  
349 agaro-oligosaccharides on non-steroidal anti-inflammatory drug-induced small intestinal injury in mice.  
350 *Journal of gastroenterology and hepatology*. 2014;29(2):310-7. doi: 10.1111/jgh.12373. PubMed PMID:  
351 23980531.
- 352 14. Kobayashi R, Takisada M, Suzuki T, Kirimuraab K, Usamiab S. Neoagarobiose as a novel moisturizer  
353 with whitening effect. *Bioscience Biotechnology and Biochemistry* 1997;61(1):162-3. doi:  
354 10.1271/bbb.61.162.
- 355 15. Kim JH, Yun EJ, Yu S, Kim KH, Kang NJ. Different Levels of Skin Whitening Activity among  
356 3,6-Anhydro-l-galactose, Agarooligosaccharides, and Neoagarooligosaccharides. *Marine drugs*.

- 357 2017;15(10):321-30. doi: 10.3390/md15100321. PubMed PMID: 29053566; PubMed Central PMCID:  
358 PMC5666429.
- 359 16. Potin P, Richard C, Rochas C, Kloreg B. Purification and characterization of the  $\alpha$ -agarase from  
360 *Alteromonas agarlyticus* (Cataldi) comb. nov., strain GJ1B. *European Journal of Biochemistry*  
361 1993;214:559-607.
- 362 17. Hassairi I, Amar RB, Nonus M, Gupta BB. Production and separation of  $\alpha$ -agarase from *Alteromonas*  
363 *agarlyticus* strain GJ1B. *Bioresource technology*. 2001;79(1):47-51.
- 364 18. Ohta Y, Hatada Y, Miyazaki M, Nogi Y, Ito S, Horikoshi K. Purification and characterization of a  
365 novel alpha-agarase from a *Thalassomonas* sp. *Current microbiology*. 2005;50(4):212-6. doi:  
366 10.1007/s00284-004-4435-z. PubMed PMID: 15902469.
- 367 19. Kirimura K, Masuda N, Iwasaki Y, Nakagawa H, Kobayashi R, Usami S. Purification and  
368 characterization of a novel  $\beta$ -agarase from an alkalophilic bacterium, *Alteromonas* sp. E-1. *Journal of*  
369 *bioscience and bioengineering*. 1999;87:436-41.
- 370 20. Kang NY, Choi YL, Cho YS, Kim BK, Jeon BS, Cha JY, et al. Cloning, expression and  
371 characterization of a  $\beta$ -agarase gene from a marine bacterium, *Pseudomonas* sp. SK38. *Biotechnology*  
372 *Letters*. 2003;25:1165-70.
- 373 21. Fu W, Han B, Duan D, Liu W, Wang C. Purification and characterization of agarases from a marine  
374 bacterium *Vibrio* sp. F-6. *Journal of industrial microbiology & biotechnology*. 2008;35(8):915-22. doi:  
375 10.1007/s10295-008-0365-2. PubMed PMID: 18478285.
- 376 22. Bhattarai Y, Kashyap PC. Agar-oligosaccharides: a new frontier in the fight against colon cancer?  
377 *American Journal of Physiology-Gastrointestinal and Liver Physiology* 2016;310(6):ajpgi.00049.2016.  
378 doi: 10.1152/ajpgi.00049.2016. PubMed PMID: 26867562; PubMed Central PMCID: PMC4796294.
- 379 23. Hu B, Gong Q, Wang Y, Ma Y, Li J, Yu W. Prebiotic effects of neoagar-oligosaccharides prepared  
380 by enzymatic hydrolysis of agarose. *Anaerobe*. 2006;12(5-6):260-6. doi: 10.1016/j.anaerobe.2006.07.005.  
381 PubMed PMID: 16973391.
- 382 24. Wang W, Liu P, Hao C, Wu L, Wan W, Mao X. Neoagar-oligosaccharide monomers inhibit  
383 inflammation in LPS-stimulated macrophages through suppression of MAPK and NF-kappaB pathways.  
384 *Scientific reports*. 2017;7:44252. doi: 10.1038/srep44252. PubMed PMID: 28266652; PubMed Central  
385 PMCID: PMC5339798.
- 386 25. Xu XQ, Su BM, Xie JS, Li RK, Yang J, Lin J, et al. Preparation of bioactive neoagaroligosaccharides  
387 through hydrolysis of *Gracilaria lemaneiformis* agar: A comparative study. *Food Chemistry*.  
388 2018;240:330-7. doi: 10.1016/j.foodchem.2017.07.036. PubMed PMID: 28946280.
- 389 26. Shi YL, Lu XZ, Yu WG. A new  $\beta$ -agarase from marine bacterium *Janthinobacterium* sp. SY12. *World*  
390 *Journal of Microbiology and Biotechnology*. 2008;24(11):2659-64. doi: 10.1007/s11274-008-9792-5.
- 391 27. Fu XT, Lin H, Kim SM. Purification and characterization of a novel beta-agarase, AgaA34, from  
392 *Agarivorans albus* YKW-34. *Applied microbiology and biotechnology*. 2008;78(2):265-73. doi:  
393 10.1007/s00253-007-1303-3. PubMed PMID: 18071641.
- 394 28. Sugano Y, Terada I, Arita M, Noma M, Matsumoto T. Purification and characterization of a new  
395 agarase from a marine bacterium, *Vibrio* sp. strain JT0107. *Applied and environmental microbiology*. 1993;  
396 59(5):1549-54.
- 397 29. Su Q, Jin T, Yu Y, Yang M, Mou H, Li L. Extracellular expression of a novel beta-agarase from  
398 *Microbulbifer* sp. Q7, isolated from the gut of sea cucumber. *AMB Express*. 2017;7(1):220. doi:  
399 10.1186/s13568-017-0525-8. PubMed PMID: 29260432; PubMed Central PMCID: PMC5736513.

- 400 30. Wang J, Mou H, Jiang X, Guan H. Characterization of a novel beta-agarase from marine *Alteromonas*  
401 sp. SY37-12 and its degrading products. *Applied microbiology and biotechnology*. 2006;71(6):833-9. doi:  
402 10.1007/s00253-005-0207-3. PubMed PMID: 16317543.
- 403 31. Lu X, Chu Y, Wu Q, Gu Y, Han F, Yu W. Cloning, expression and characterization of a new  
404 agarase-encoding gene from marine *Pseudoalteromonas* sp. *Biotechnology Letters*. 2009;31(10):1565-70.  
405 doi: 10.1007/s10529-009-0042-1. PubMed PMID: 19504047.
- 406 32. Long M, Yu Z, Xu X. A novel beta-agarase with high pH stability from marine *Agarivorans* sp. LQ48.  
407 *Marine biotechnology*. 2010;12(1):62-9. doi: 10.1007/s10126-009-9200-7. PubMed PMID: 19484308.
- 408 33. Oh C, Nikapitiya C, Lee Y, Whang I, Kim SJ, Kang DH, et al. Cloning, purification and biochemical  
409 characterization of beta agarase from the marine bacterium *Pseudoalteromonas* sp. AG4. *Journal of*  
410 *industrial microbiology & biotechnology*. 2010;37(5):483-94. doi: 10.1007/s10295-010-0694-9. PubMed  
411 PMID: 20213114.
- 412 34. Lee DG, Jang MK, Lee OH, Kim NY, Ju SA, Lee SH. Over-production of a glycoside hydrolase  
413 family 50 beta-agarase from *Agarivorans* sp. JA-1 in *Bacillus subtilis* and the whitening effect of its  
414 product. *Biotechnology Letters*. 2008;30(5):911-8. doi: 10.1007/s10529-008-9634-4. PubMed PMID:  
415 18189120.
- 416 35. Zhu Y, Zhao R, Xiao A, Li L, Jiang Z, Chen F, et al. Characterization of an alkaline beta-agarase from  
417 *Stenotrophomonas* sp. NTa and the enzymatic hydrolysates. *International journal of biological*  
418 *macromolecules*. 2016;86:525-34. doi: 10.1016/j.ijbiomac.2016.01.106. PubMed PMID: 26836616.
- 419 36. Yang M, Mao X, Liu N, Qiu Y, Xue C. Purification and characterization of two agarases from  
420 *Agarivorans albus* OAY02. *Process Biochemistry*. 2014;49(5):905-12. doi: 10.1016/j.procbio.2014.02.015.
- 421 37. Ma C, Lu X, Shi C, Li J, Gu Y, Ma Y, et al. Molecular cloning and characterization of a novel  
422 beta-agarase, AgaB, from marine *Pseudoalteromonas* sp. CY24. *Journal of Biological Chemistry*.  
423 2007;282(6):3747-54. doi: 10.1074/jbc.M607888200. PubMed PMID: 17166842.
- 424 38. Osumi Y, Kawai M, Amano H, Noda H. Purification and structure of oligosaccharides from  
425 porphyran degraded by enzymes from *Arthrobacter* sp. S-22. *Nippon Suisan Gakkaishi*. 1998;64:88-97.
- 426 39. Chen HM, Zheng L, Lin W, Yan XJ. Product monitoring and quantitation of oligosaccharides  
427 composition in agar hydrolysates by precolumn labeling HPLC. *Talanta*. 2004;64(3):773-7. doi:  
428 10.1016/j.talanta.2004.04.002. PubMed PMID: 18969671.
- 429 40. Li J, Han F, Lu X, Fu X, Ma C, Chu Y, et al. A simple method of preparing diverse  
430 neoagaro-oligosaccharides with beta-agarase. *Carbohydrate research*. 2007;342(8):1030-3. doi:  
431 10.1016/j.carres.2007.02.008. PubMed PMID: 17359946.
- 432 41. Morrice LM, McLean MW, Long WF, Williamson FB.  $\beta$ -Agarases I and II from *Pseudomonas*  
433 *atlantica*. *European Journal of Biochemistry*. 1983;137:149-54.
- 434 42. Kazlowski B, Pan CL, Ko YT. Separation and quantification of neoagaro- and agaro-oligosaccharide  
435 products generated from agarose digestion by beta-agarase and HCl in liquid chromatography systems.  
436 *Carbohydrate research*. 2008;343(14):2443-50. doi: 10.1016/j.carres.2008.06.019. PubMed PMID:  
437 18701090.
- 438 43. Kazlowski B, Pan CL, Ko YT. Monitoring and preparation of neoagaro- and agaro-oligosaccharide  
439 products by high performance anion exchange chromatography systems. *Carbohydrate polymers*.  
440 2015;122:351-8. doi: 10.1016/j.carbpol.2014.09.003. PubMed PMID: 25817679.
- 441 44. Han JP, Huang YY, Ye J, Xiao MT. Screening and identification of a bacterium capable of converting  
442 agar to neoagaro oligosaccharides. *Acta Microbiologica Sinica*. 2015;55(9):1126-32.

- 443 45. Fan JM, Xie CQ, Jia J, Yin XU, Zhang CX. Optimization of extraction processing on polysaccharides  
444 from *Pleurotus eryngii* by cellulase enzymolysis. *Food Science and Technology*. 2013;38:192-6. doi:  
445 10.13684/j.cnki.spkj.2013.03.004.
- 446 46. Liu JB, Zhao SN, Lin SY, Zhang Y, Ren M. Process optimization on extracting collagen with  
447 enzymolysis method from black fungus. *Transactions of the Chinese Society of Agricultural Engineering*.  
448 2012;28:282-6. doi: 10.3969/j.issn.1002-6819.2012.13.045.
- 449 47. Hong SJ, Lee JH, Kim EJ, Yang HJ, Park JS, Hong SK. Toxicological evaluation of  
450 neogaroooligosaccharides prepared by enzymatic hydrolysis of agar. *Regulatory Toxicology and*  
451 *Pharmacology*. 2017;90:9-21. doi: 10.1016/j.yrtph.2017.08.001. PubMed PMID: 28782575.
- 452 48. Mei J, Shao J, Wang Q, Wang H, Yi Y, Ying G. Separation and quantification of  
453 neogaro-oligosaccharides. *Journal of Food Science and Technology-mysore*. 2013;50(6):1217-21. doi:  
454 10.1007/s13197-011-0448-3. PubMed PMID: 24426038; PubMed Central PMCID: PMC3791241.

## 455 **Supporting information**

456 **S1 Fig. The ESIMS spectra of NA2, NA6, NA8, NA10 and NA12**

457 **S2 Fig. <sup>1</sup>H NMR spectra of NA2, NA6, NA8, NA10 and NA12**

458 **S3 Fig. <sup>13</sup>C-NMR spectra of NA2, NA6, NA8, NA10 and NA12**



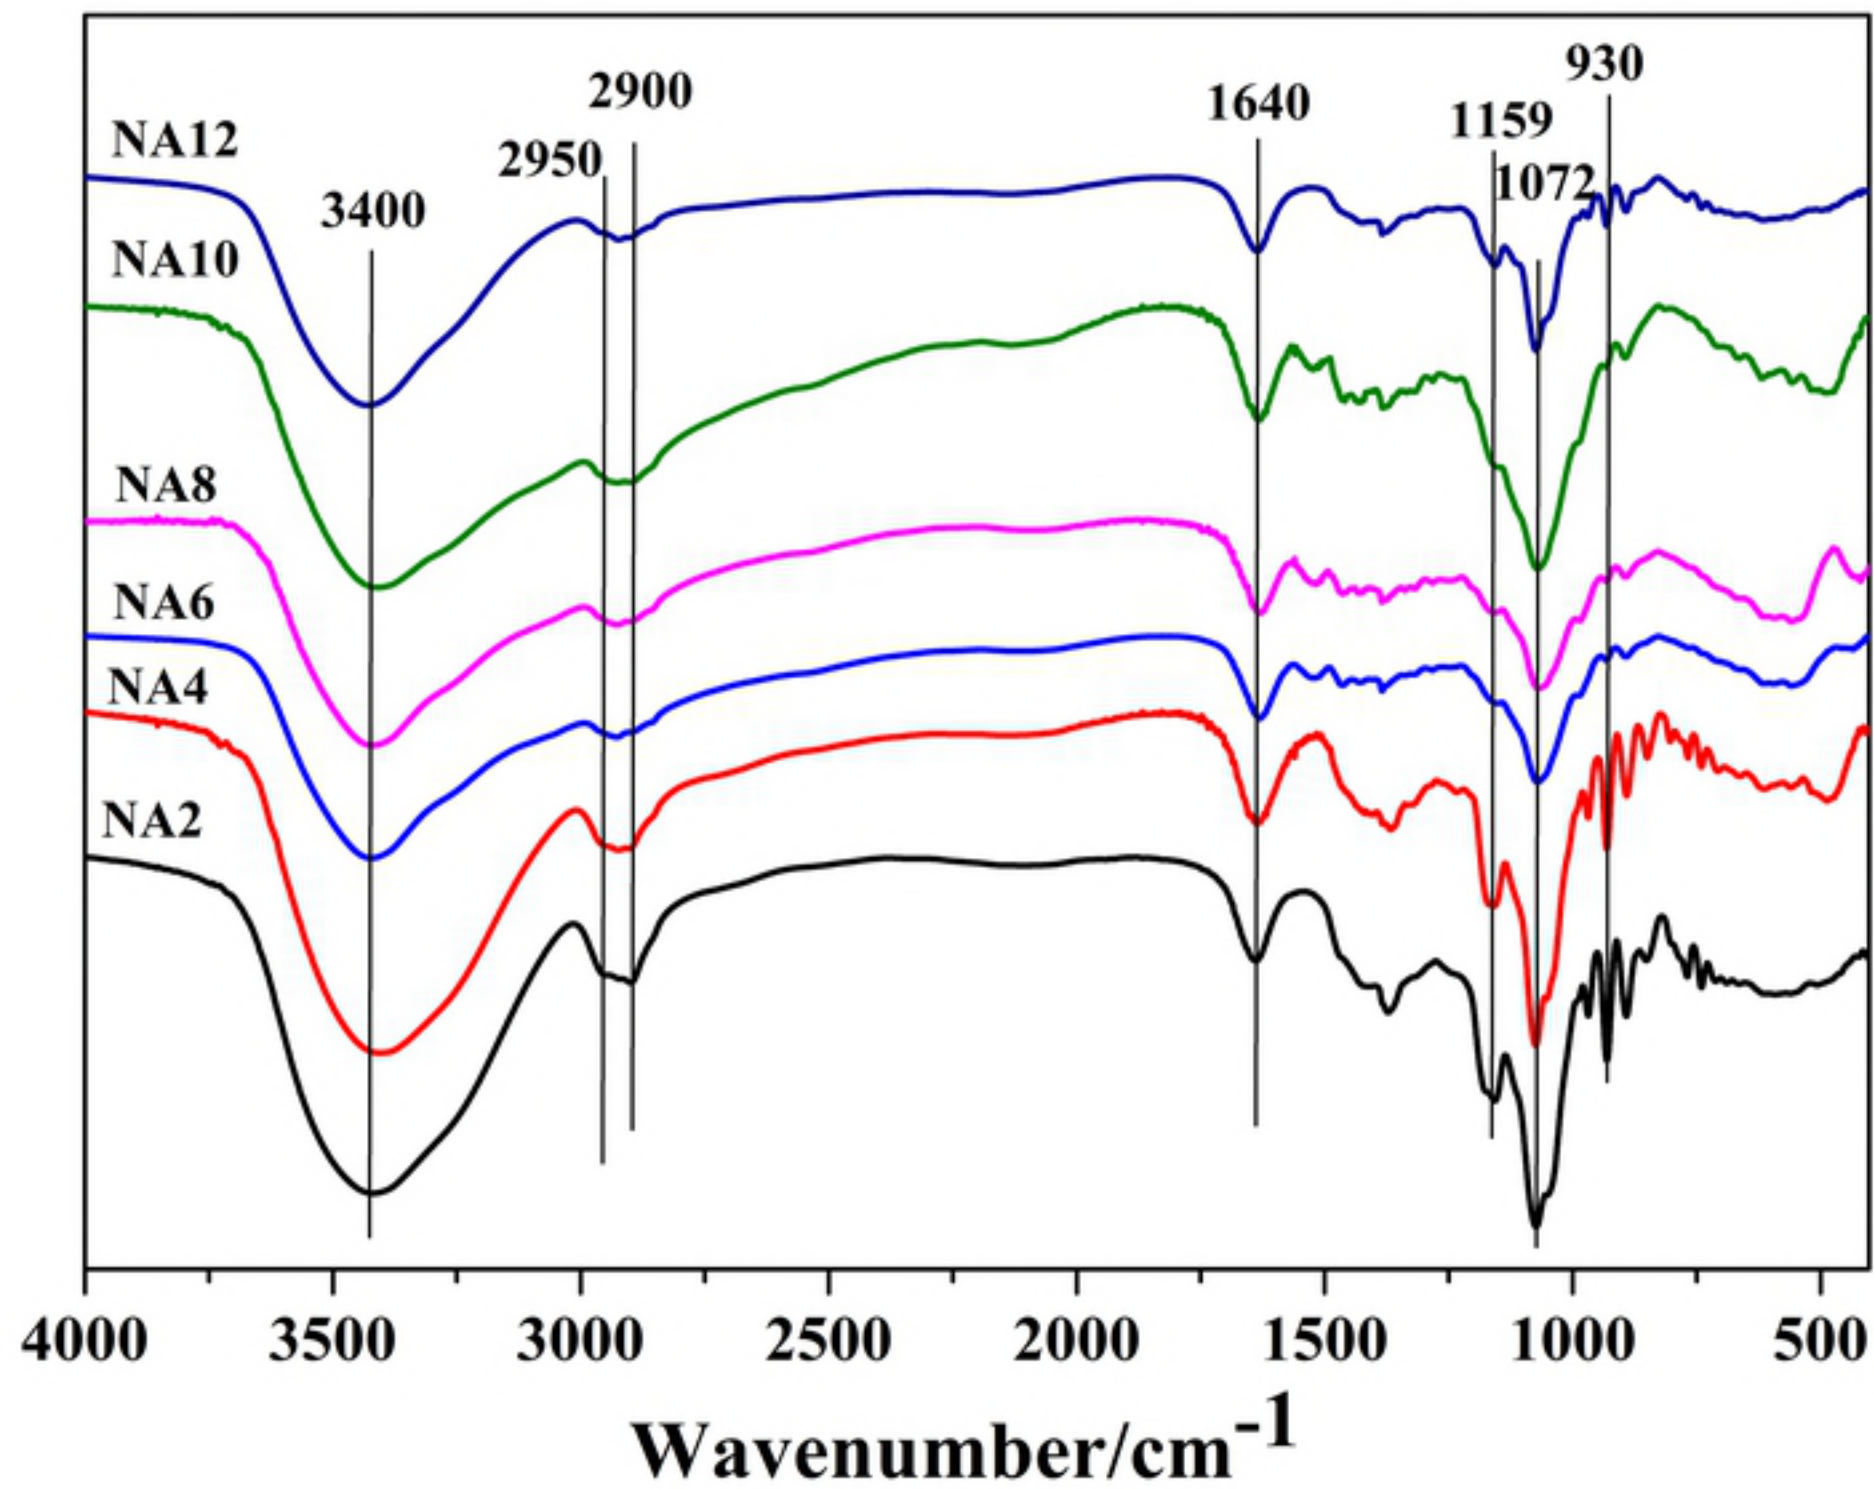

NA4

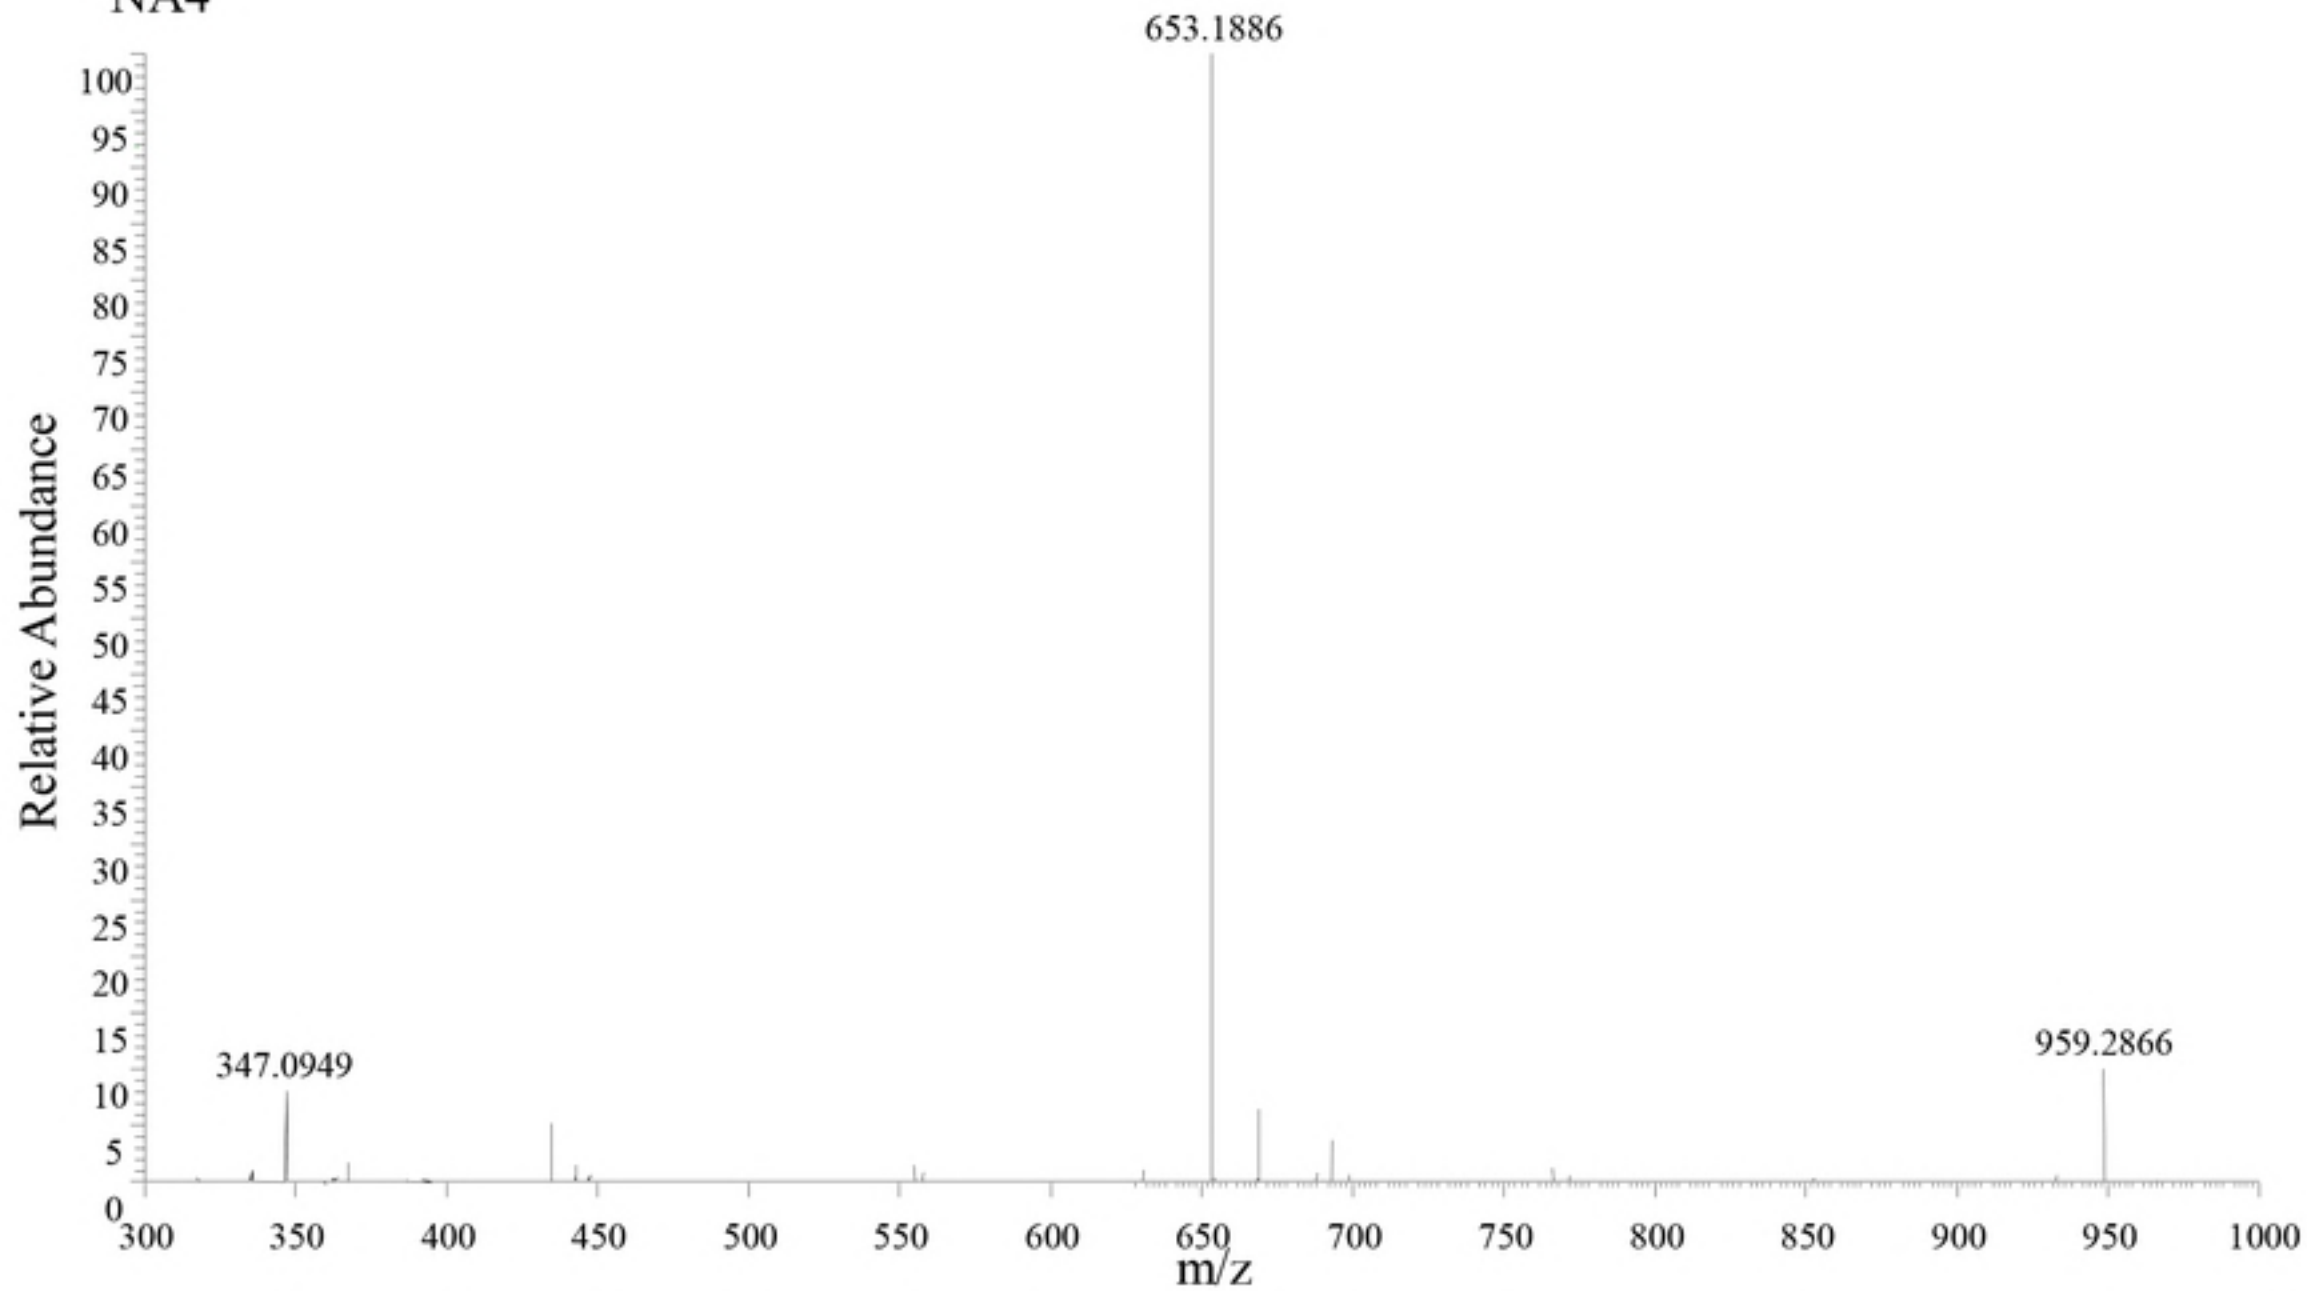

NA4

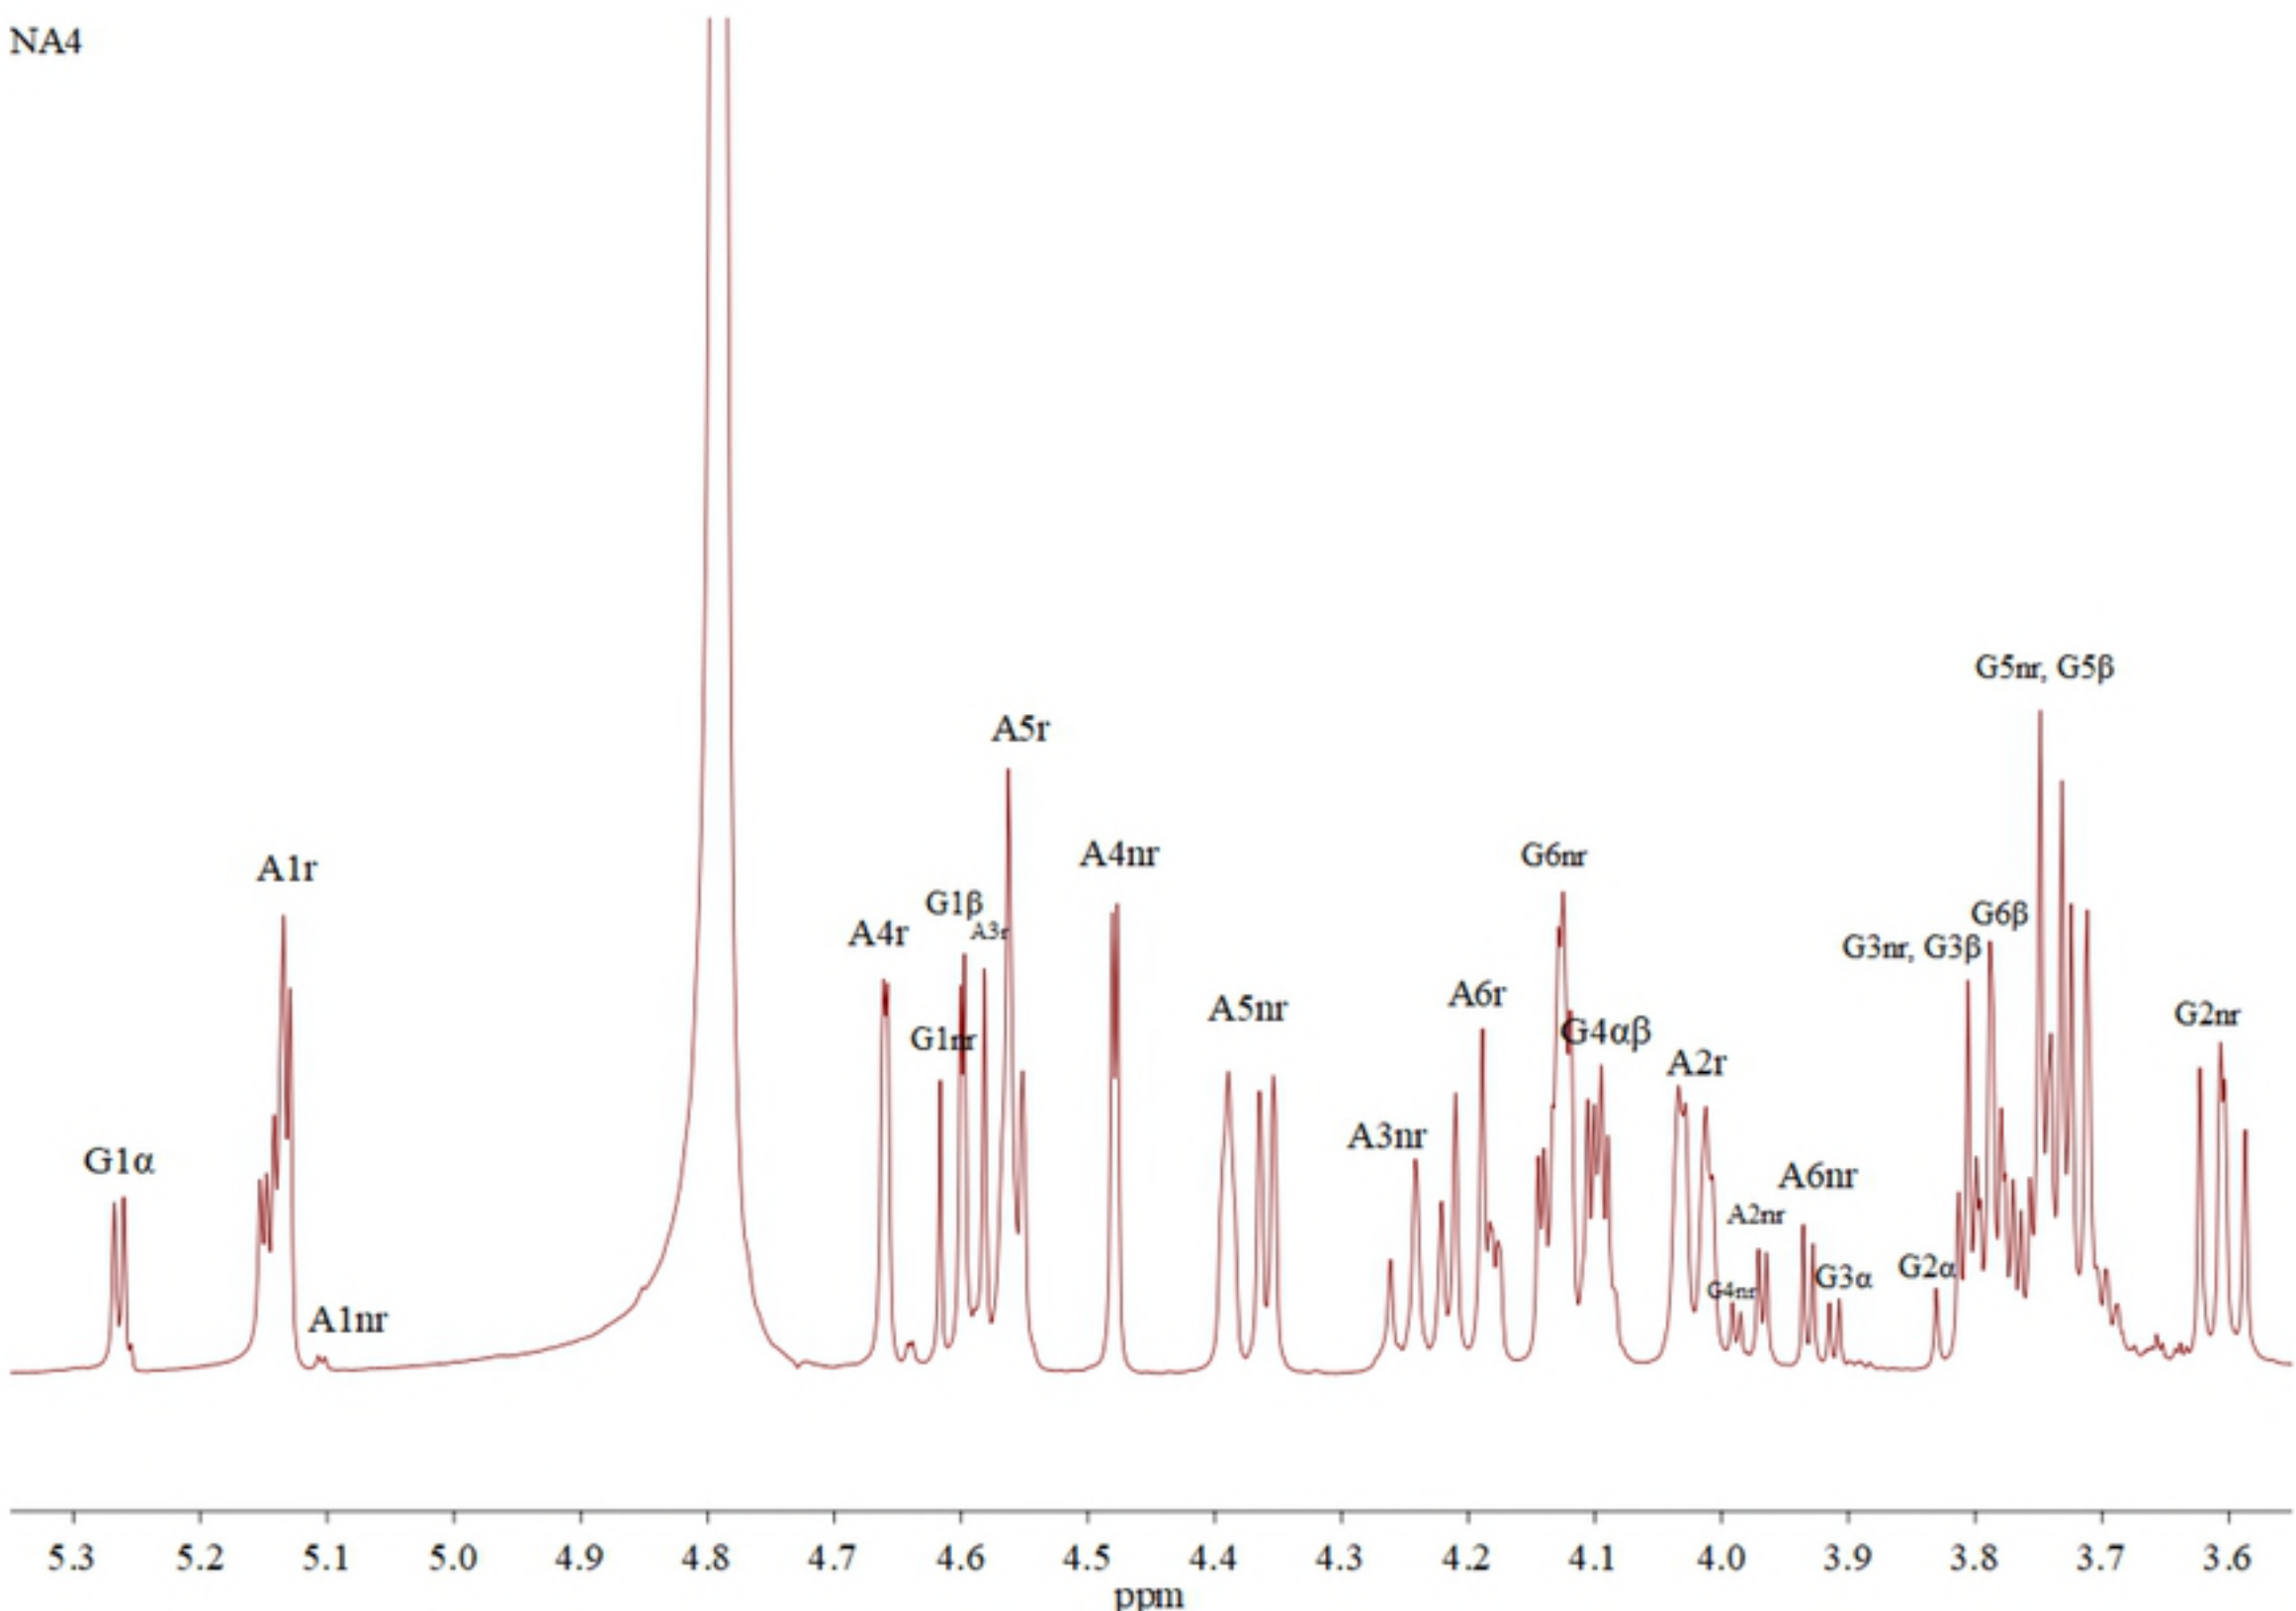

NA4

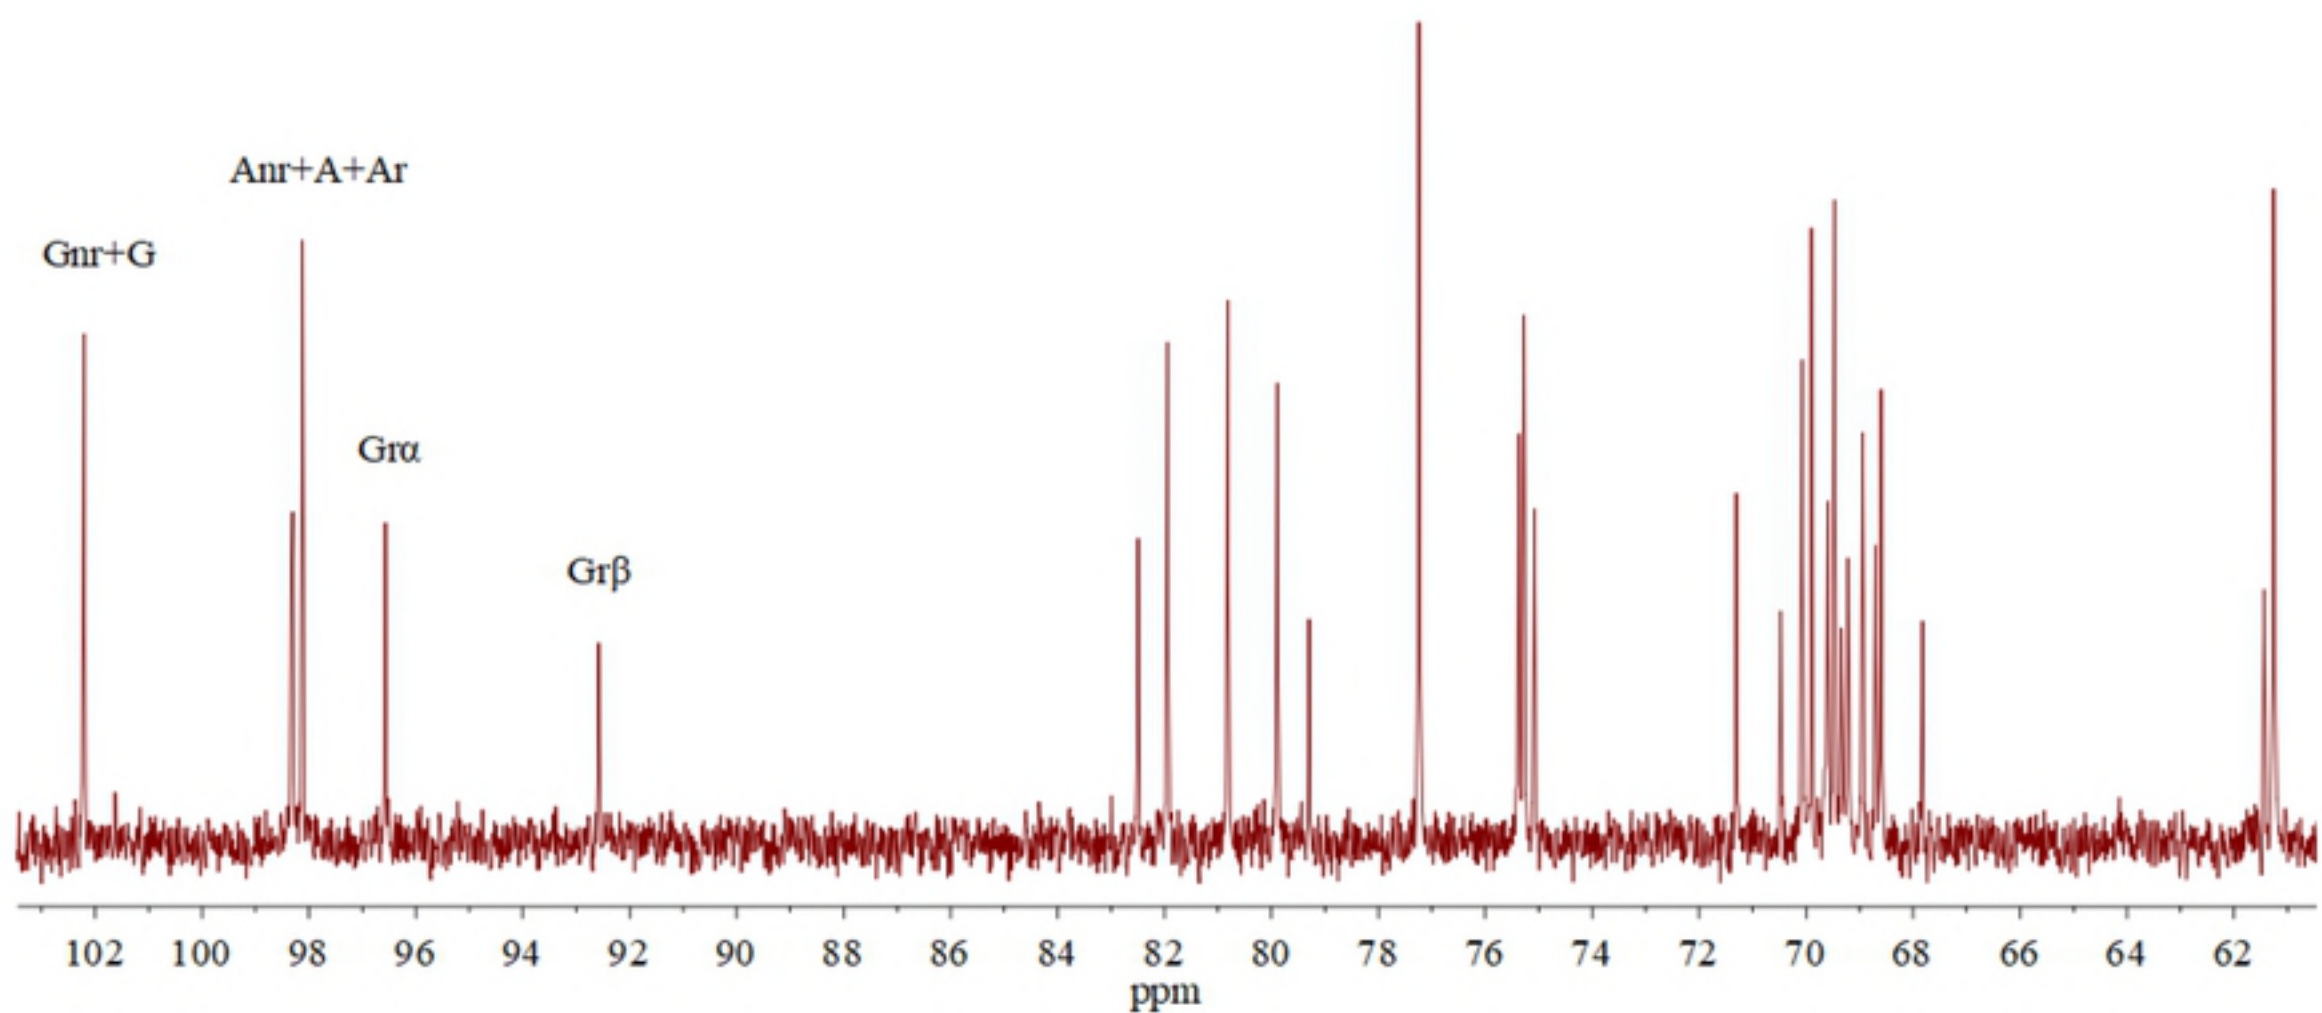

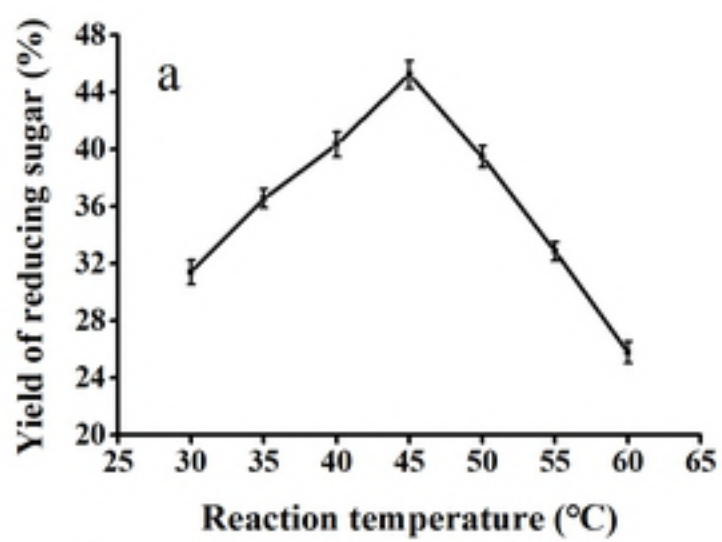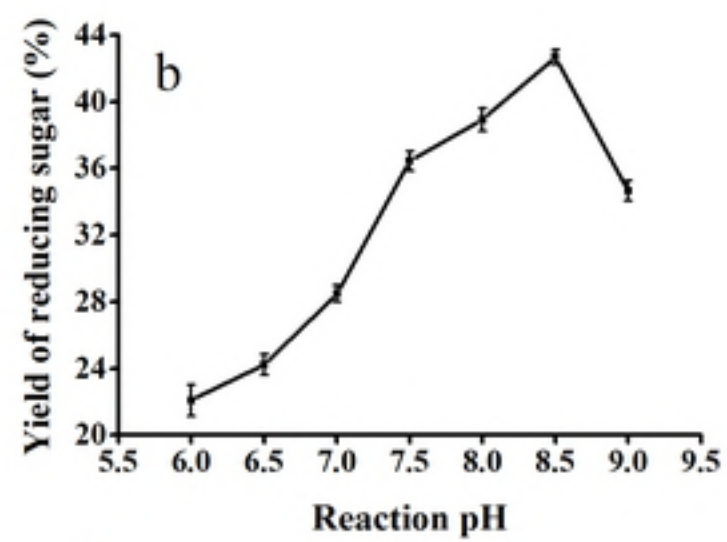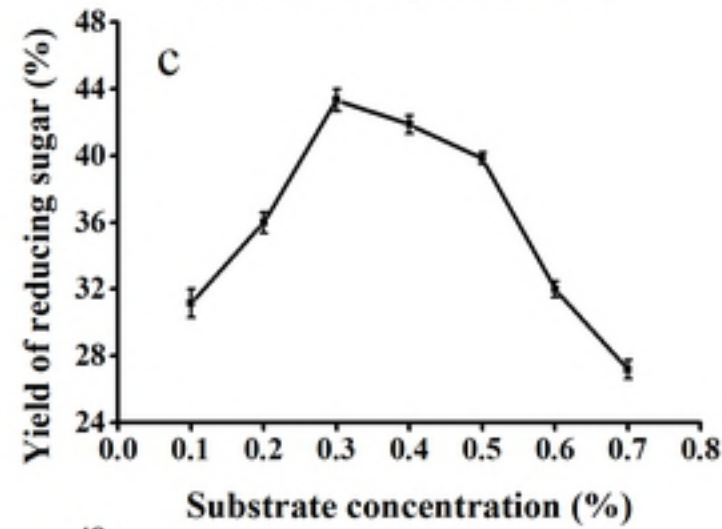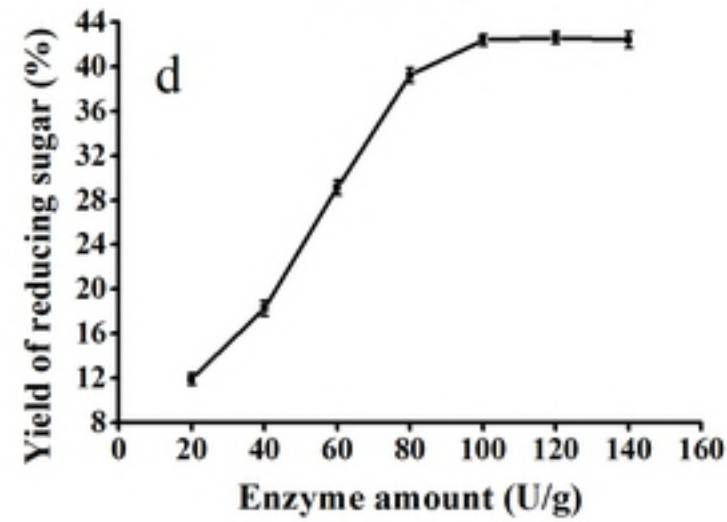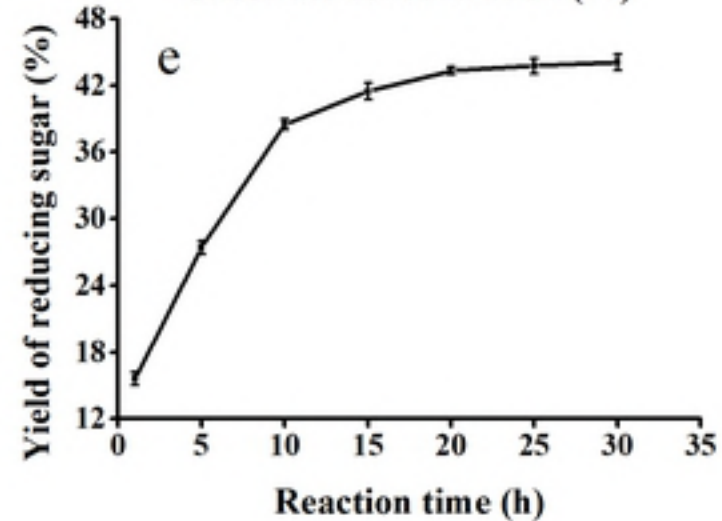

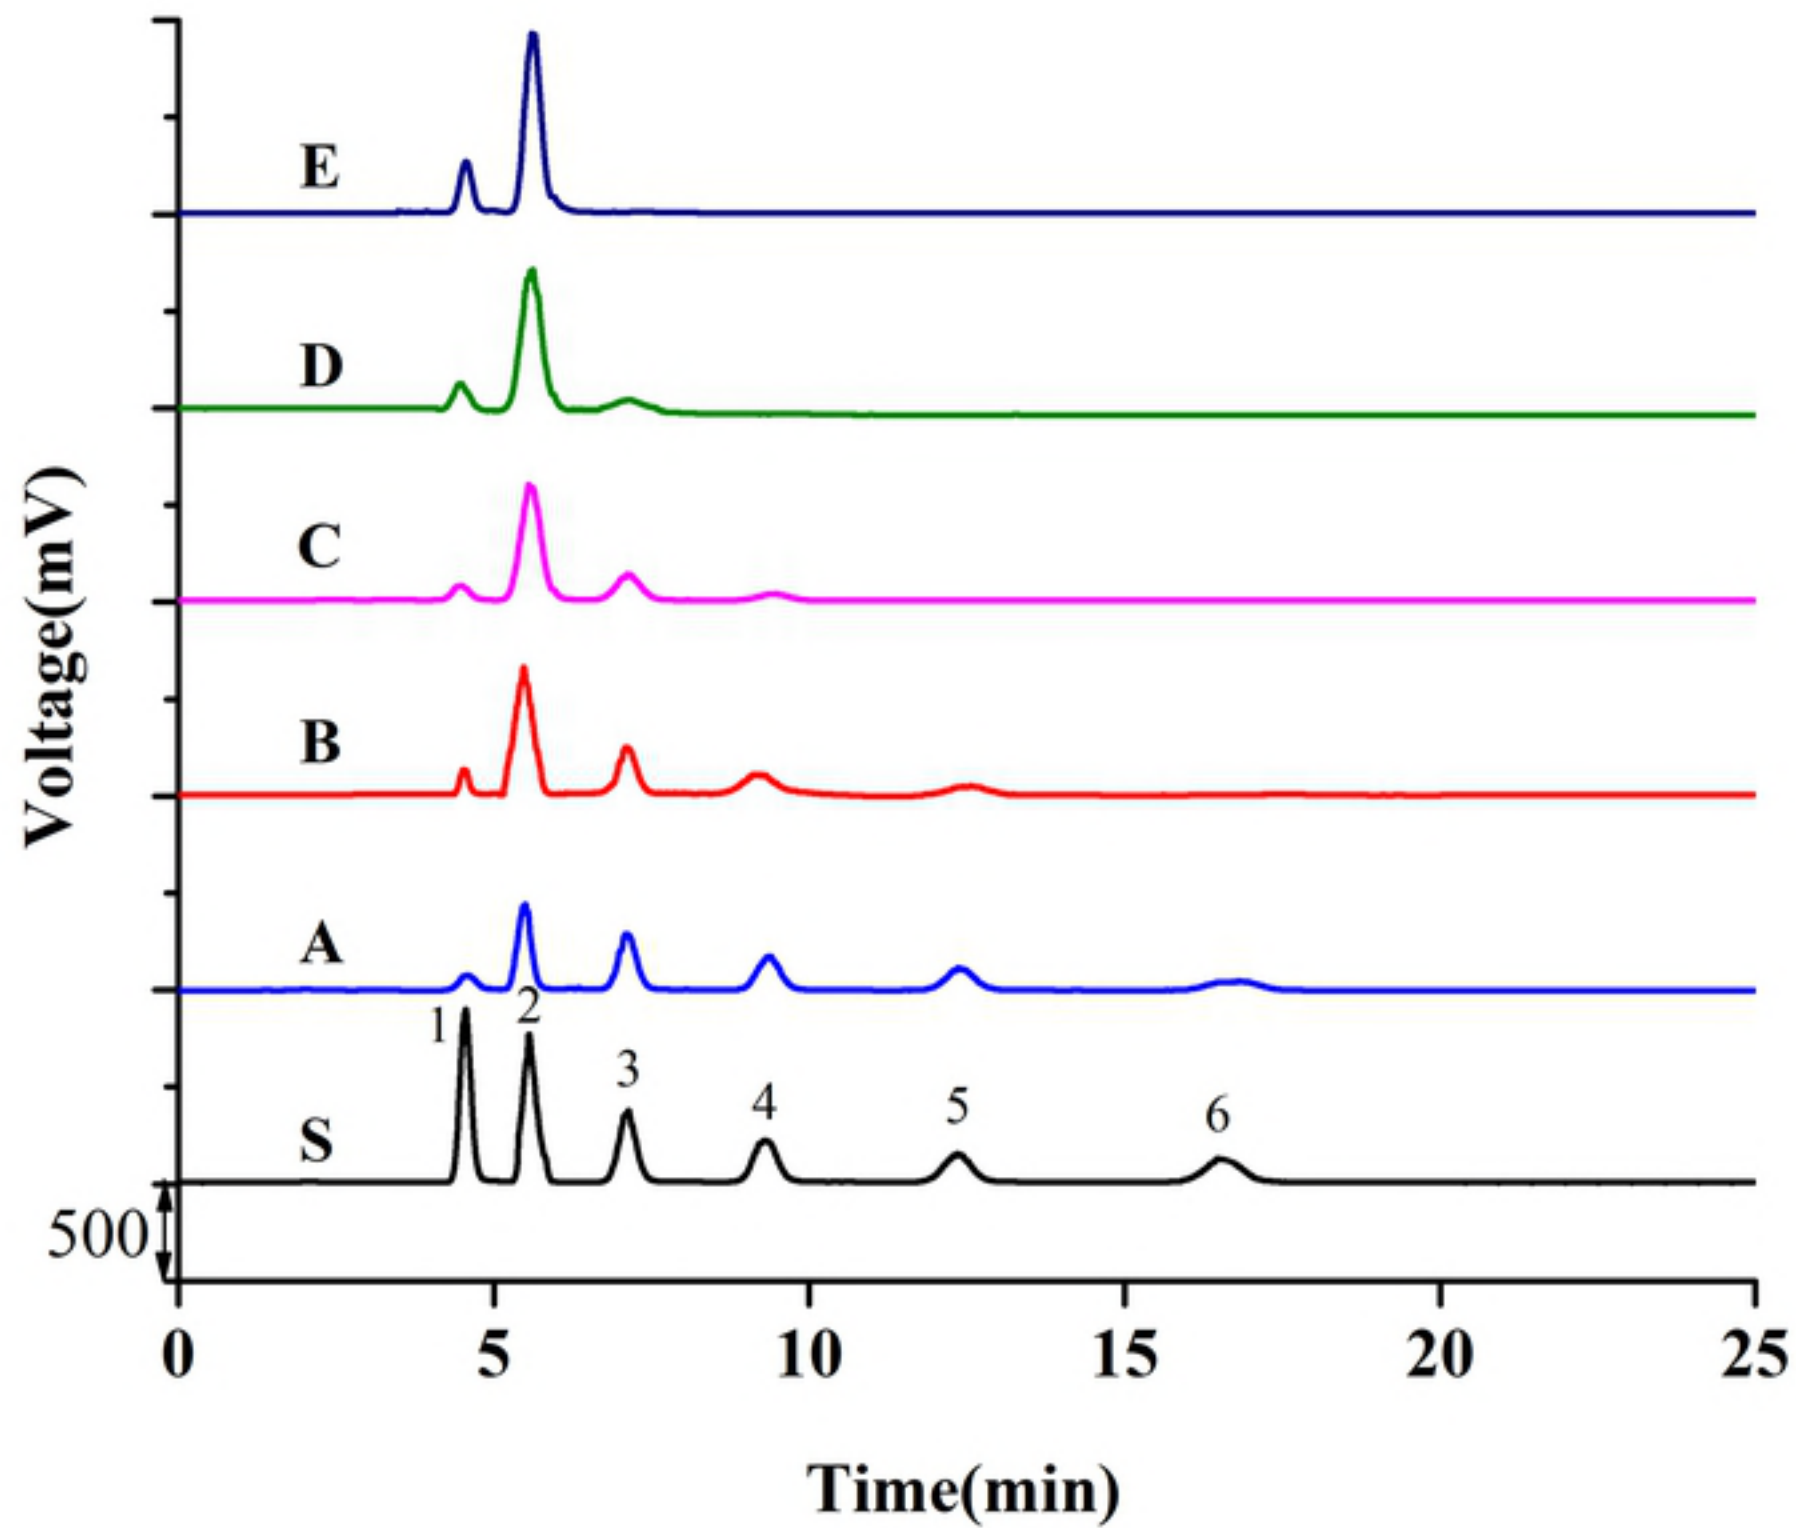

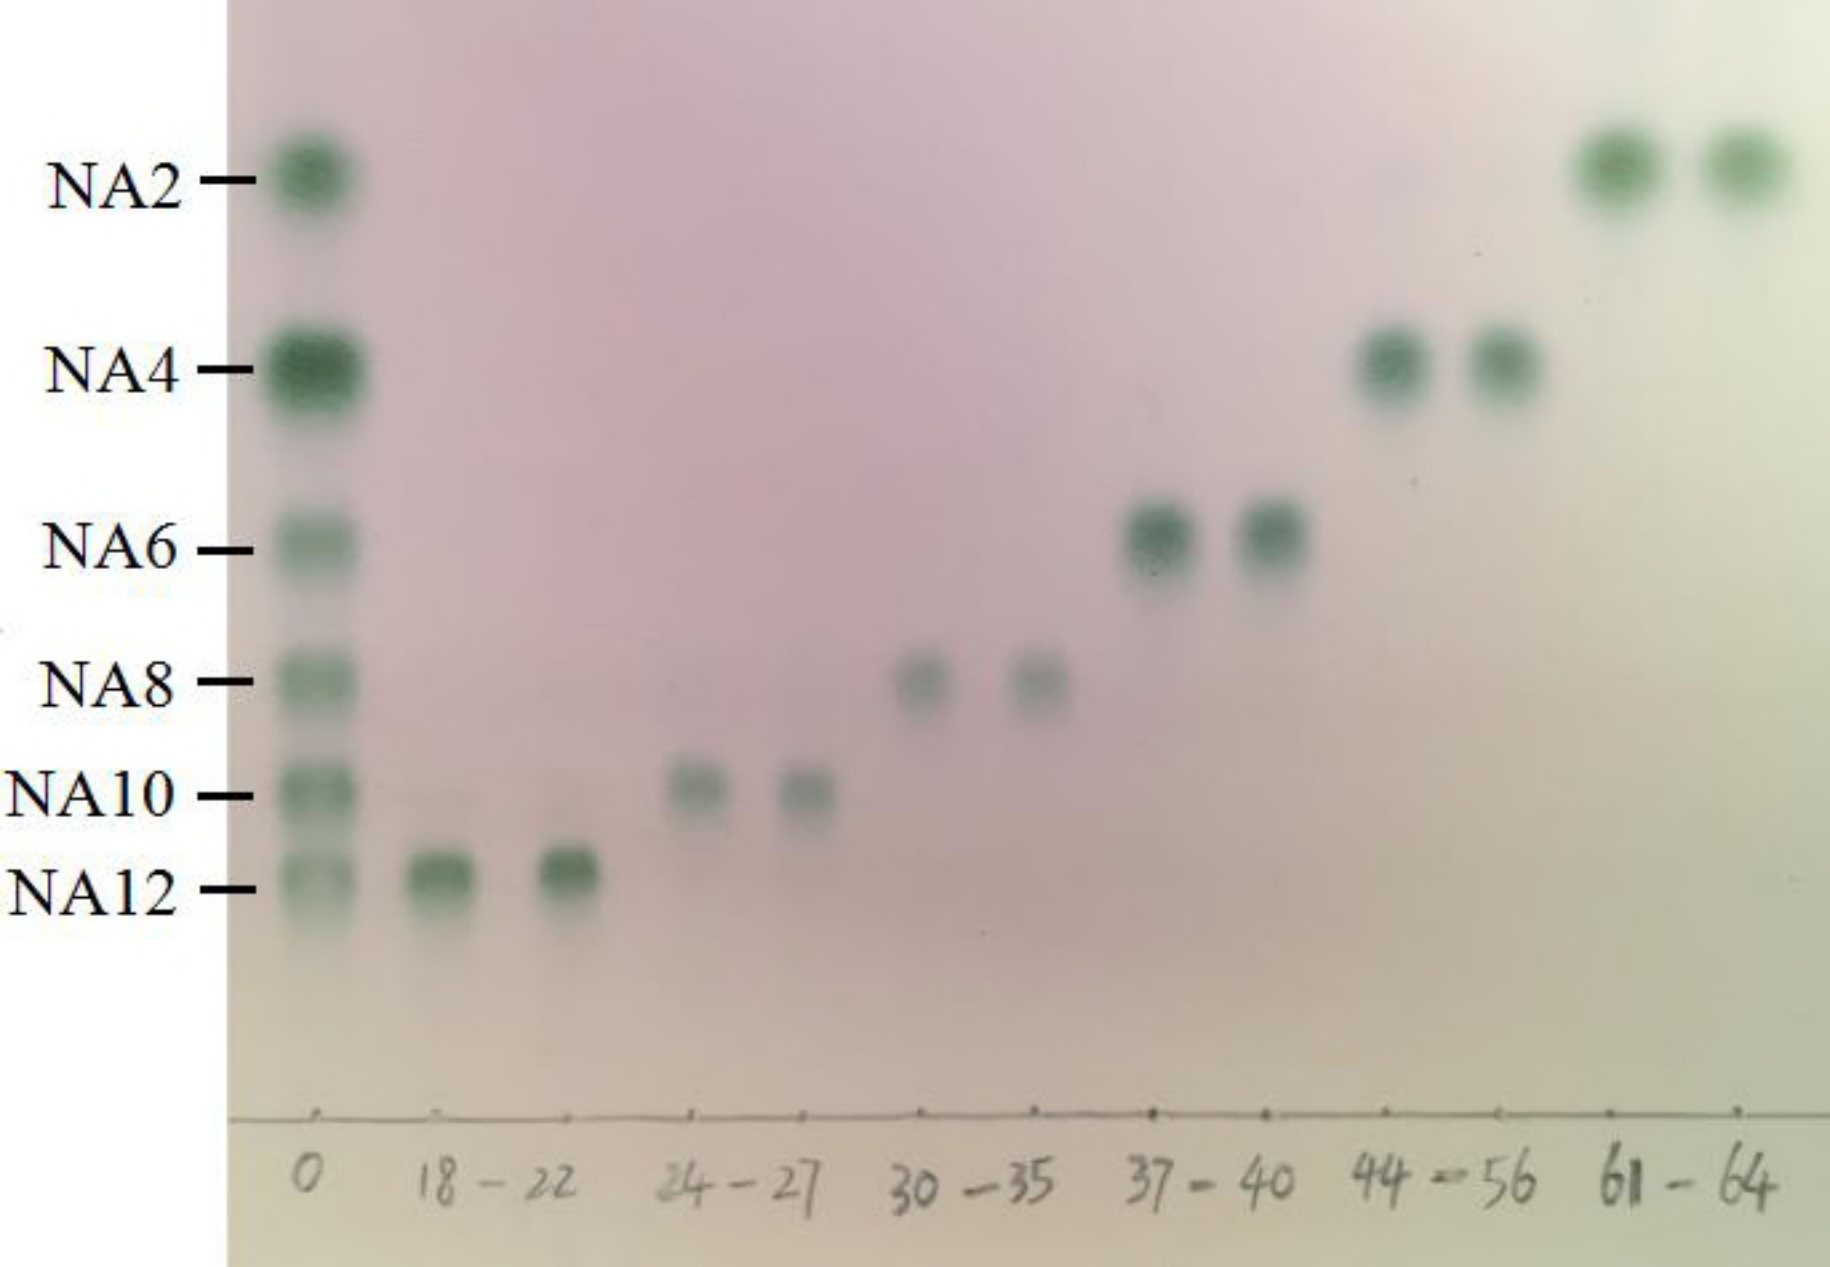

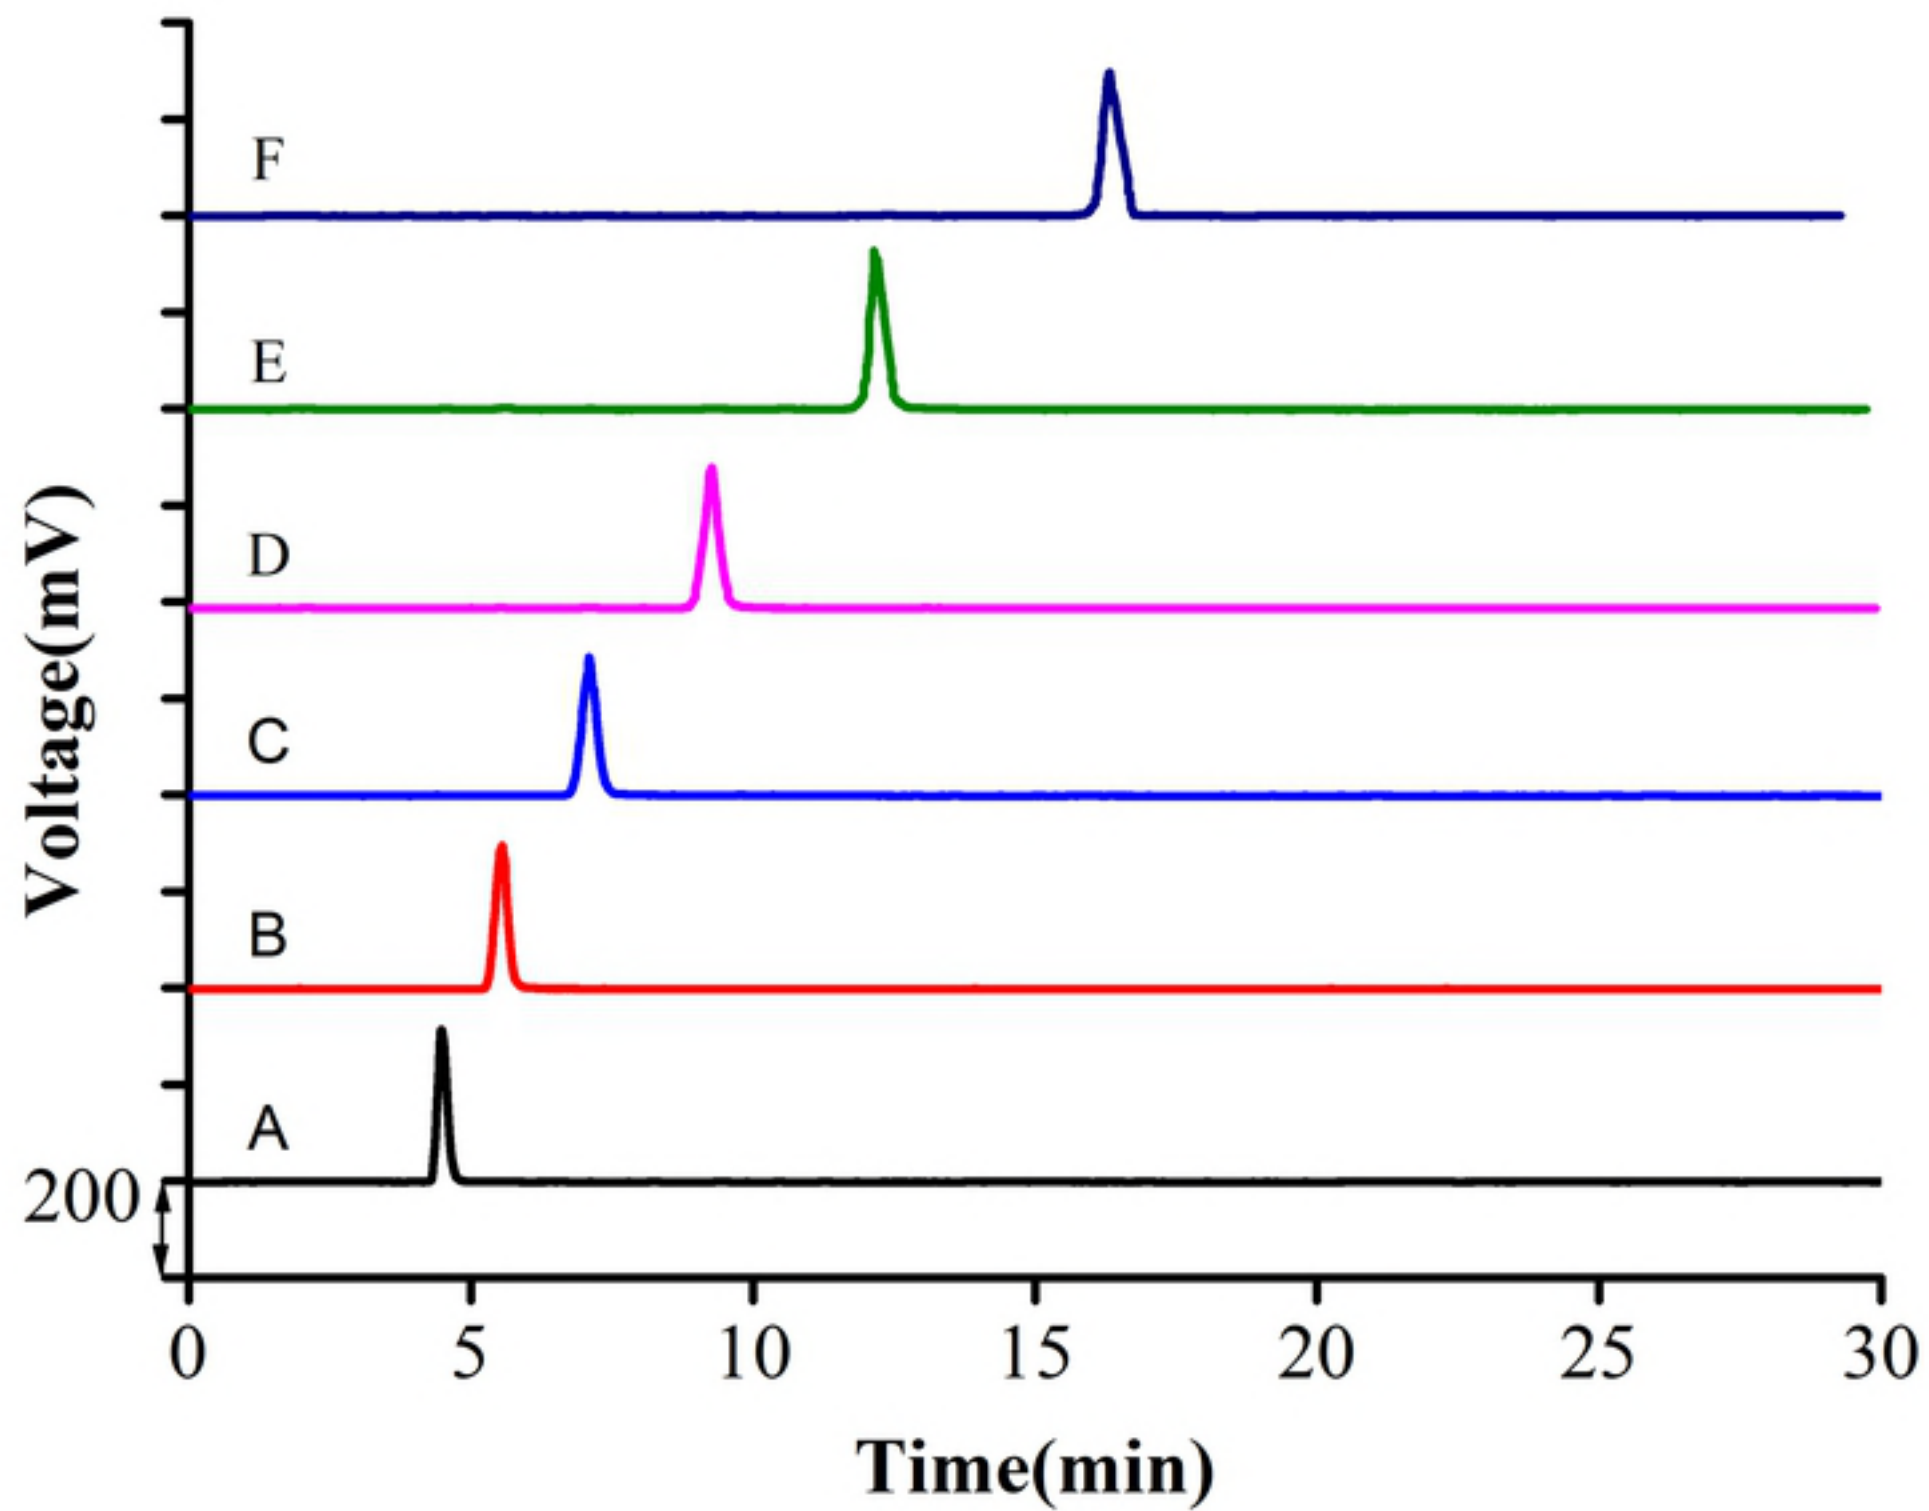

Source: https://www.biorxiv.org/content/10.1101/363739v1.full.pdf
